# Response to Hyperosmotic Stress

Haruo Saito<sup>\*1</sup> and Francesc Posas<sup>†1</sup>

<sup>\*</sup>Division of Molecular Cell Signaling, Institute of Medical Science, The University of Tokyo, Minato-ku, Tokyo 108-8638, Japan, and <sup>†</sup>Cell Signaling Unit, Departament de Ciències Experimentals i de la Salut, Universitat Pompeu Fabra, E-08003 Barcelona, Spain

**ABSTRACT** An appropriate response and adaptation to hyperosmolarity, *i.e.*, an external osmolarity that is higher than the physiological range, can be a matter of life or death for all cells. It is especially important for free-living organisms such as the yeast *Saccharomyces cerevisiae*. When exposed to hyperosmotic stress, the yeast initiates a complex adaptive program that includes temporary arrest of cell-cycle progression, adjustment of transcription and translation patterns, and the synthesis and retention of the compatible osmolyte glycerol. These adaptive responses are mostly governed by the high osmolarity glycerol (HOG) pathway, which is composed of membrane-associated osmosensors, an intracellular signaling pathway whose core is the Hog1 MAP kinase (MAPK) cascade, and cytoplasmic and nuclear effector functions. The entire pathway is conserved in diverse fungal species, while the Hog1 MAPK cascade is conserved even in higher eukaryotes including humans. This conservation is illustrated by the fact that the mammalian stress-responsive p38 MAPK can rescue the osmosensitivity of *hog1Δ* mutations in response to hyperosmotic challenge. As the HOG pathway is one of the best-understood eukaryotic signal transduction pathways, it is useful not only as a model for analysis of osmotic stress responses, but also as a model for mathematical analysis of signal transduction pathways. In this review, we have summarized the current understanding of both the upstream signaling mechanism and the downstream adaptive responses to hyperosmotic stress in yeast.

## TABLE OF CONTENTS

|                                                     |     |
|-----------------------------------------------------|-----|
| Abstract                                            | 289 |
| Introduction                                        | 290 |
| Upstream Signaling Mechanisms                       | 291 |
| <i>Overview of the HOG pathway</i>                  | 291 |
| <i>Sln1 branch of the HOG pathway</i>               | 292 |
| <i>Two-component signal transduction system:</i>    | 292 |
| <i>Sln1-Ypd1-Ssk1 multistep phosphorelay:</i>       | 292 |
| <i>Regulation of Sln1 HK activity:</i>              | 293 |
| <i>HPT protein Ypd1:</i>                            | 293 |
| <i>Activation of the Ssk2/Ssk22 MAPKKs by Ssk1:</i> | 293 |
| <i>Ssk2/Ssk22-Pbs2-Hog1 kinase cascade:</i>         | 294 |
| <i>Sln1-Ypd1-Skn7 multistep phosphorelay:</i>       | 294 |
| <i>Sho1 branch of the HOG pathway</i>               | 295 |

*Continued*

Copyright © 2012 by the Genetics Society of America

doi: 10.1534/genetics.112.140863

Manuscript received March 30, 2012; accepted for publication June 11, 2012

Available freely online through the author-supported open access option.

<sup>†</sup>Corresponding authors: Institute of Medical Science, The University of Tokyo, Minato-ku, Tokyo 108-8638, Japan. E-mail: h-saito@ims.u-tokyo.ac.jp; and Departament de Ciències Experimentals i de la Salut, Universitat Pompeu Fabra, E-08003 Barcelona, Spain. E-mail: francesc.posas@upf.edu

CONTENTS, *continued*

|                                                                           |     |
|---------------------------------------------------------------------------|-----|
| Overview:                                                                 | 295 |
| Putative osmosensors <i>Msb2</i> and <i>Hkr1</i> :                        | 295 |
| Co-osmosensor <i>Sho1</i> :                                               | 296 |
| Adaptor protein <i>Ste50</i> :                                            | 296 |
| Membrane anchor <i>Opy2</i> :                                             | 297 |
| Activation of <i>Ste20/Cla4</i> :                                         | 297 |
| Activation of <i>Ste11</i> by <i>Ste20/Cla4</i> :                         | 298 |
| Activation of <i>Pbs2</i> by <i>Ste11</i> :                               | 298 |
| Activation of the HOG pathway by non-osmotic stresses                     | 298 |
| Nuclear transport of activated <i>Hog1</i>                                | 298 |
| Dynamics of HOG pathway signaling                                         | 299 |
| Negative feedback by glycerol accumulation:                               | 299 |
| Negative feedback by protein phosphatases:                                | 300 |
| Negative feedback by phosphorylation of upstream elements:                | 300 |
| Inhibition of crosstalk among MAPK signaling pathways:                    | 300 |
| Single-cell dynamics:                                                     | 301 |
| In silico simulation:                                                     | 301 |
| Downstream Adaptive Responses                                             | 301 |
| Reestablishment of osmotic balance                                        | 301 |
| Compatible osmolytes:                                                     | 301 |
| Glycerol accumulation:                                                    | 301 |
| Metabolic adjustments:                                                    | 302 |
| Glycerol transport:                                                       | 302 |
| General stress responses                                                  | 302 |
| Regulation of gene expression by osmostress                               | 303 |
| Global analysis of gene expression upon osmostress:                       | 303 |
| <i>Hog1</i> controls gene expression by regulating transcription factors: | 304 |
| <i>Hog1</i> controls gene expression by associating with chromatin:       | 304 |
| Transcription initiation at osmostress-responsive promoters:              | 305 |
| Transcription elongation of osmostress-responsive genes:                  | 305 |
| Remodeling of chromatin in response to osmostress:                        | 306 |
| Control of mRNA processing and stability by <i>Hog1</i> :                 | 306 |
| Regulation of cell-cycle progression by osmostress                        | 306 |
| G <sub>1</sub> /S transition:                                             | 307 |
| S phase:                                                                  | 308 |
| G <sub>2</sub> phase:                                                     | 308 |
| Exit from mitosis:                                                        | 309 |
| Other downstream effectors of the <i>Hog1</i> MAPK                        | 309 |
| Ion channels:                                                             | 309 |
| Protein kinases regulated by <i>Hog1</i> :                                | 309 |
| Perspectives                                                              | 310 |

**S**ACCHAROMYCES (literally, sugar yeast) thrive, in their natural habitat, on decomposing fruits, including grape, where sugar (such as glucose, fructose, and sucrose) is abundant. As the fruits dry, the sugar concentration may approach its saturation point. This high sugar concentration poses a dilemma to the yeast, as the abundant food also brings unfavorable osmotic conditions that are a potential threat to their survival. Increased external osmolarity induces water efflux, an increased concentration of cytosolic ions (especially Na<sup>+</sup>), and cell shrinkage, which are all detrimental to cell growth [for general biological effects of osmostress,

see Wood (1999, 2011)]. Amazingly, yeast can grow and vigorously ferment in media containing as much as 40% (2.2 M) glucose (Watanabe *et al.* 2010), which is obviously a highly dangerous osmotic condition.

Therefore, to cope with such an increased external osmolarity, yeast initiates a complex adaptive program that includes temporary arrest of cell-cycle progression, adjustment of transcription and translation patterns, and the synthesis and retention of the compatible osmolyte glycerol (Figure 1). These adaptive responses are mostly governed by the high osmolarity glycerol (HOG) signaling pathway,

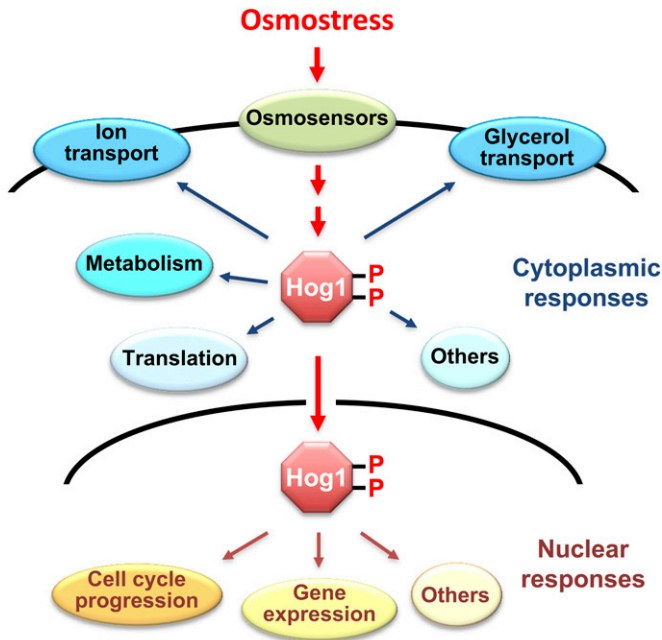

**Figure 1** Osmo-adaptive responses in yeast. In response to an increase in extracellular osmolarity, the Hog1 MAPK is activated, which leads to the induction of cytoplasmic and nuclear adaptive responses. Cytoplasmic responses include the control of ionic fluxes and glycerol transport, metabolic enzymes, and protein translation. Nuclear responses include the modulation of cell-cycle progression and the control of gene expression.

whose core is the *Hog1* MAP kinase (MAPK) cascade. In this review, we have summarized the current, often fragmentary, understanding of both the upstream signaling mechanism of osmstress and the downstream adaptive responses. Because the HOG pathway is highly conserved across fungal species, elucidation of the signaling and effector mechanisms in *Saccharomyces cerevisiae* will be highly relevant to the studies of other yeasts and fungi (Krantz *et al.* 2006a,b). We endeavored to be as comprehensive as possible, but due to space limitations, many interesting subjects had to be left out. Readers who are interested in various aspects of yeast osmstress responses are encouraged to consult a number of excellent review articles (Gustin *et al.* 1998; Sprague 1998; Chellappan 2001; Hohmann 2002a,b, 2009; O'Rourke *et al.* 2002; Saito and Tatebayashi 2004; Schwartz and Madhani 2004; Sheikh-Hamad and Gustin 2004; Chen and Thorner 2007; Hohmann *et al.* 2007; de Nadal and Posas 2010).

## Upstream Signaling Mechanisms

### Overview of the HOG pathway

The central core of the HOG pathway is the *Hog1* MAPK cascade. MAPK cascades are evolutionarily conserved signaling units that are utilized in many intracellular signal transduction pathways in diverse eukaryotic organisms, including fungi and yeast (Chen *et al.* 2001). Each MAPK cascade is composed of three sequentially activating kinases (Figure 2). A MAPK is activated by a MAPK kinase (MAPKK) by dual

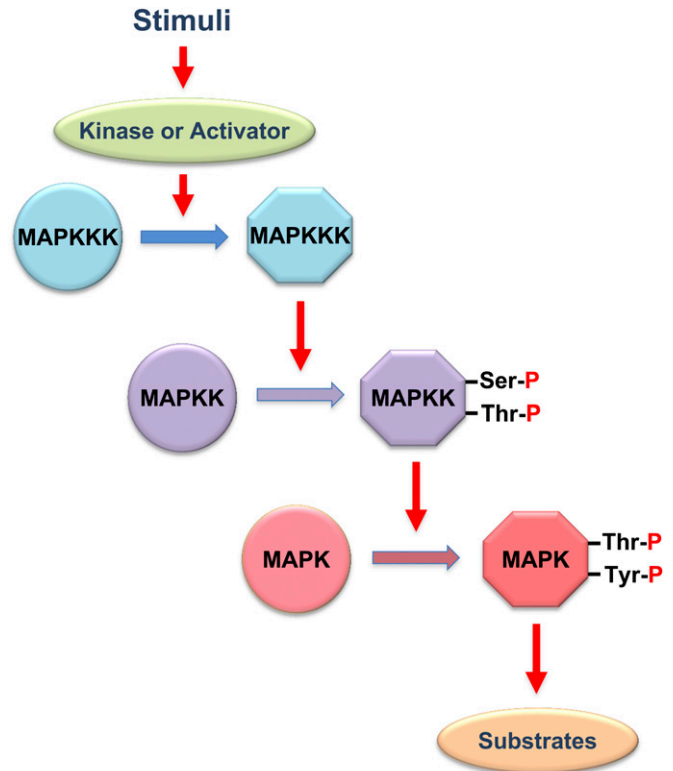

**Figure 2** A schematic diagram of the MAP kinase module. Circles and hexagons represent, respectively, inactive and active forms of kinases. MAPK, MAP kinase; MAPKK, MAPK kinase; MAPKKK, MAPKK kinase.

phosphorylation of the conserved Thr and Tyr residues in the TXY motif within the activation loop. A MAPKK is similarly activated by a MAPKK kinase (MAPKKK) by phosphorylation of the Ser/Thr residues in its activation loop. The first kinase of the cascade, MAPKKK, is activated either by phosphorylation by an upstream kinase, sometimes called MAPKKKK, or by binding of an activator protein, depending on the pathway. Each MAPK module is activated by specific types of stimuli and induces specific adaptive responses.

The upstream part of the HOG pathway comprises the functionally redundant, but mechanistically distinct, *Sln1* and *Sho1* branches (Figure 3). A signal emanating from either branch converges on a common MAPKK, *Pbs2*, which is the specific activator of the *Hog1* MAPK (Brewster *et al.* 1993; Maeda *et al.* 1994). The *Sln1* branch activates the redundant *Ssk2* and *Ssk22* MAPKKKs, which then activate *Pbs2* (Maeda *et al.* 1995). The *Sho1* branch activates the *Ste11* MAPKKK, which also activates *Pbs2* (Posas and Saito 1997). Thus, a mutant that lacks both the *SSK2* and *SSK22* genes (an *ssk2Δ ssk22Δ* mutant) is totally dependent on the *Sho1* branch for activation of the *Hog1* MAPK, whereas a mutant that lacks *STE11* is dependent on the *Sln1* branch. Once activated, a substantial fraction of the *Hog1* MAPK is transported into the nucleus where it regulates transcription and the cell cycle, although there are also *Hog1* targets in the cytoplasm. As adaptation proceeds, and osmotic balance is re-established, *Hog1* activity goes down to near basal

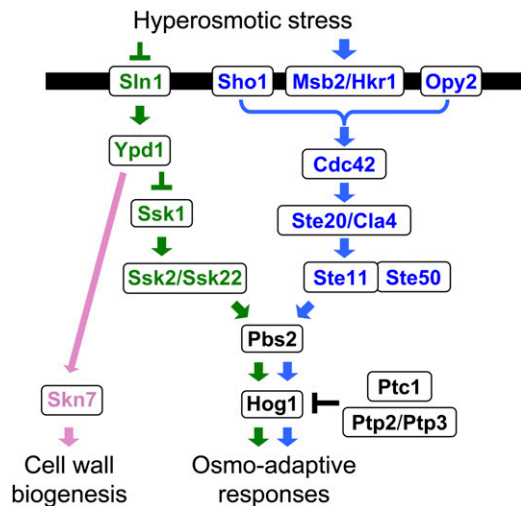

**Figure 3** A schematic diagram of the yeast HOG pathway. The protein names separated by a slash (/) are functionally redundant. Proteins that are specific to the Sln1 branch are colored green, those that are specific to the Sho1 branch are colored blue, and those that are common are colored black. The black horizontal bar represents the plasma membrane. Arrows indicate activation, whereas the T-shaped bars represent inhibition.

levels, and *Hog1* is exported back to the cytoplasm. Thus, there are mechanisms that control *Hog1* nuclear import/export, as well as downregulation of *Hog1* activity.

There are several other signal pathways that utilize a MAPK cascade in yeast, which are involved in the mating response, filamentous and invasive growth (FIG), and regulation of cell-wall biogenesis. Surprisingly, three of these pathways (HOG, mating, and FIG) share many of the same signaling elements, including the *Ste11* MAPKKK. Thus, it is important to prevent signal leakage from one pathway into another pathway. This aim seems to be attained by insulation and exquisite network of reciprocal cross-regulation among the signaling pathways.

### *Sln1* branch of the HOG pathway

**Two-component signal transduction system:** The *Sln1* branch of the HOG pathway is a variation of the so-called two-component system. Two-component systems are ubiquitous in prokaryotes, plants, and fungi (for comprehensive reviews, see Stock *et al.* 2000; Gao and Stock 2009; Casino *et al.* 2010; Schaller *et al.* 2011). As the name implies, the prototypical two-component system is composed of two proteins (Figure 4A): the first is a sensor histidine kinase (SHK) that contains an input (or sensor) domain, a HK catalytic domain, and a histidine auto-phosphorylation site, and the second is a response regulator (RR) that contains an output (or effector) domain and a receiver (REC) domain. When the input domain senses a relevant stimulus, the HK is activated (or inactivated), and a histidine residue located near the HK domain is phosphorylated (or dephosphorylated). This phosphoryl group is then transferred to the acceptor aspartate residue in the REC domain of a cognate RR. This phosphotransfer reaction is termed the His-Asp phosphore-

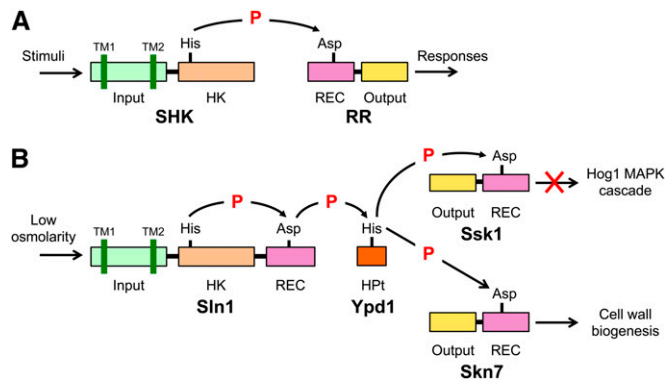

**Figure 4** Schematic diagram of two-component signaling systems. (A) The prototypical two-component system that is characterized by the conserved phosphotransfer reaction between a histidine residue and an aspartate residue. (B) The *Sln1*-*Ypd1*-*Ssk1* multistep phosphorelay. SHK, sensor histidine kinase; RR, response regulator; HK, histidine kinase domain; REC, receiver domain; HPT, histidine-containing phospho-transfer protein; TM, transmembrane segment; P, phosphoryl group.

lay. Because both histidine phosphate and aspartate phosphate are energetically activated, they are often symbolized as  $\text{His}\sim\text{P}$  and  $\text{Asp}\sim\text{P}$ . In bacteria, numerous simple two-component systems exist that are composed of an SHK and a cognate RR. However, there are also more complex variations of this theme, where the basic His-Asp phosphorelay reaction is repeated twice so that a phosphoryl group is transferred sequentially through a His-Asp-His-Asp multistep phosphorelay (Figure 4B). In a complex two-component system, a phosphoryl group is initially transferred from a HK domain to a cognate REC domain as in the simple systems. This phosphoryl group, however, is then transferred to an intermediate phospho-carrier termed histidine-containing phospho-transfer (HPT) protein, which catalyzes specific phospho-transfer reactions between two REC domains. The phosphoryl group is then transferred from HPT to a second REC domain. The *Sln1* branch of the yeast HOG pathway is an example of complex two-component systems (Posas *et al.* 1996; Saito 2001). In the budding yeast, there are three REC proteins (*Sln1*, *Ssk1*, and *Skn7*), but only one SHK (*Sln1*) and one HPT (*Ypd1*). In fact, *Sln1* governs two distinct signaling pathways: the *Sln1*-*Ypd1*-*Ssk1* multistep phosphorelay, which regulates hyper-osmolarity responses, and the *Sln1*-*Ypd1*-*Skn7* multistep phosphorelay, which makes a contribution to hypo-osmolarity responses.

***Sln1*-*Ypd1*-*Ssk1* multistep phosphorelay:** The N-terminal half of *Sln1* is the sensor domain that is composed of an extracellular domain (ECD) flanked by two transmembrane segments, TM1 and TM2 (Ota and Varshavsky 1993; Maeda *et al.* 1994). The C-terminal half is composed of a HK domain and a REC domain; hence *Sln1* is termed a “hybrid histidine kinase.” When activated, the *Sln1* HK auto-phosphorylates His-576 near the HK domain, using ATP as a phospho-donor (Posas *et al.* 1996). This phosphoryl group is then transferred to Asp-1144 in the *Sln1* REC domain. It is likely that the HK

catalytic site of one molecule phosphorylates the His phosphorylation site in another molecule in an *Sln1* dimer. The phosphate is then transferred to His-64 of *Ypd1*, an HPT protein. The phosphoryl group on *Ypd1* is finally transferred to Asp-554 in the REC domain of *Ssk1*.

**Regulation of *Sln1* HK activity:** Genetic analyses of various mutants in the *Sln1* pathway suggest that the *Sln1* HK domain is catalytically active under normal osmotic conditions, whereas it is inactivated when the environmental osmolarity is increased (Maeda *et al.* 1994; Fassler and West 2010). *In vitro* reconstitution of the *Sln1*-*Ypd1*-*Ssk1* multistep phosphorelay reactions supports the same conclusion (Posas *et al.* 1996). As expected, the ECD and its flanking transmembrane (TM) domains are important for regulation of the HK activity. For example, deletion of TM1 constitutively activates, whereas removal of both TM1 and ECD inactivates, *Sln1* HK (Ostrander and Gorman 1999). *In vivo*, *Sln1* seems to respond to changes in turgor pressure (the pressure exerted by water inside the cell against the cell wall). When yeast is exposed to high external osmolarity, turgor pressure decreases as the cytoplasm shrinks. An earlier study suggested that turgor change rather than water loss activates the HOG pathway (Tamás *et al.* 2000), which was later supported by biophysical analyses (Schaber *et al.* 2010). Consistent with these findings, *Sln1* HK activity is inhibited when turgor is reduced by the antifungal antibiotic nystatin or by enzymatic removal of the cell wall (Reiser *et al.* 2003). Conversely, *Sln1* HK activity is enhanced by increased turgor pressure caused by raised intracellular glycerol concentration (Tao *et al.* 1999). In a more recent study, it was found that the presence of the abundant GPI-anchored cell-wall mannoprotein *Ccw12* has a role in *Sln1* HK activation (Shankarnarayan *et al.* 2008). These results suggest that *Sln1* responds to osmolarity-induced changes in the cell wall. On the other hand, it was also found that the *Sln1* branch of the HOG pathway is activated when membrane fluidity is reduced by a rapid downshift in temperature to  $<10^\circ$  or by dimethyl sulfoxide treatment (Hayashi and Maeda 2006; Panadero *et al.* 2006). Hypoxia also activates the *Sln1* branch, perhaps by an altered membrane fluidity caused by depletion of heme and ergosterol (Hickman *et al.* 2011). These results suggest that *Sln1* might respond to changes in the plasma membrane. Cold activation of the HOG pathway might be physiologically important because *Hog1*-dependent accumulation of glycerol would protect yeast from freezing. In any case, it is clear that further studies are needed to establish the biophysical nature of the stimuli that control *Sln1* activity.

**HPT protein *Ypd1*:** *Ypd1* is a small protein of 167 aa and is composed of a four-helix bundle with the phospho-accepting histidine (His-64) in the middle of the third helix (Song *et al.* 1999; Xu and West 1999). *Ypd1* interacts with three different REC domains, one each in *Sln1*, *Ssk1*, and *Skn7*. A systematic Ala-scanning mutagenesis of *Ypd1* coupled to

two-hybrid interaction analyses indicated that the REC domains of *Sln1*, *Ssk1*, and *Skn7* interact with *Ypd1* at overlapping binding sites (Porter *et al.* 2003; Porter and West 2005). The  $\alpha 1$  helix of the *Ssk1* REC domain was identified as the interaction site with *Ypd1* by isolation of *Ssk1* mutants that cannot interact with *Ypd1* (Horie *et al.* 2008). The structure of a complex between *Ypd1* and the REC domain of *Sln1* is consistent with these mutational studies (Xu *et al.* 2003; Zhao *et al.* 2008).

Phosphotransfer reactions involving wild-type *Ypd1* are very rapid, reaching steady-state levels in  $<5$  sec *in vitro* (Janiak-Spens and West 2000). Thus, detailed kinetic analyses are possible only by using a rapid quench flow apparatus (Kaserer *et al.* 2010). Perhaps the most important finding is that phosphotransfer from *Ypd1*~P to *Ssk1* is both very rapid ( $160 \text{ sec}^{-1}$ ) and irreversible, whereas that from *Ypd1*~P to *Skn7* is slower ( $1.4 \text{ sec}^{-1}$ ) and readily reversible (Janiak-Spens *et al.* 2005). These and other kinetic properties of *Ypd1* are consistent with the notion that *Ssk1* is constitutively phosphorylated under normal osmotic conditions.

**Activation of the *Ssk2/Ssk22* MAPKKs by *Ssk1*:** *Ssk1* activates a pair of homologous, and functionally redundant, MAPKKs termed *Ssk2* and *Ssk22* (Maeda *et al.* 1995). Like many other members of the MAPKK family, the kinase catalytic domain of *Ssk2/Ssk22* is near the C-terminal end, and there is an auto-inhibitory domain (AID) in the N-terminal region. *Ssk1* binds to the N-terminal region of *Ssk2/Ssk22*, and, perhaps by conformational change, relieves the catalytic domain from inhibition by the AID (Posas and Saito 1998). Since the *Sln1* HK is active under normal osmotic conditions, *Ssk1* is constitutively phosphorylated by *Ypd1*~P. However, under hyperosmotic conditions, unphosphorylated *Ssk1*-OH will accumulate, and it binds and activates *Ssk2/Ssk22*. Consistent with this notion, expression of unphosphorylatable *Ssk1* mutants such as *Ssk1*-D544S or *Ssk1* mutants that cannot interact with *Ypd1* (and thus cannot accept phosphate from *Ypd1*~P), such as *Ssk1*-I514T, hyperactivate the *Hog1* MAPK cascade (Horie *et al.* 2008).

Asp~P is chemically unstable and is spontaneously hydrolyzed. Indeed, the half-life of purified *Ssk1*~P is only  $\sim 13$  min *in vitro* (Janiak-Spens *et al.* 2000). If it is similarly unstable in cells, then it is unlikely that all of the *Ssk1* is stably converted to *Ssk1*~P, and therefore there is a possibility that persistent *Ssk1*-OH would activate the *Hog1* MAPK cascade in the absence of any osmotic stimulation. However, several mechanisms exist that prevent erroneous activation of the *Hog1* MAPK cascade. First, the half-life of *Ssk1*~P dramatically increases to 40 hr when *Ypd1* is included in the incubation reaction *in vitro* (Janiak-Spens *et al.* 1999). It was proposed that *Ypd1* forms a stable complex with *Ssk1*~P and sterically shields the phosphorylated Asp residue from hydrolysis (Janiak-Spens *et al.* 2000). Such enhanced stability of *Ssk1*~P would maintain the levels of *Ssk1*-OH in unstimulated cells at a level low enough that inadvertent activation of the *Hog1* MAPK cascade would be

prevented. Second, any residual *Ssk1*-OH that may still exist would not contribute significantly to *Ssk2/Ssk22* activation because only a doubly dephosphorylated *Ssk1* dimer, (*Ssk1*-OH)<sub>2</sub>, can activate *Ssk2* and *Ssk22* (Horie *et al.* 2008). For example, when 1% of *Ssk1* is dephosphorylated, only 0.01% of *Ssk1* dimer is doubly dephosphorylated. Third, *Ssk1*-OH is degraded by a ubiquitin-proteasome-dependent mechanism, which may serve as an additional safeguard against spontaneous activation of *Ssk2/Ssk22* in the absence of osmotic stress (Sato *et al.* 2003). Finally, it should be noted that there is in fact a low basal signaling in the *Sln1* pathway in the absence of any external stimulation, which may allow more rapid response upon osmotic stress (Macia *et al.* 2009).

Although stable *Ssk1*~P is required to prevent spontaneous *Hog1* activation under nonstimulated conditions, it causes another difficulty under high-osmolarity conditions. When yeast is exposed to hyper-osmolarity, activation of the *Hog1* MAP kinase cascade occurs within minutes, which requires a much faster dephosphorylation of *Ssk1*~P than the observed half-life of 40 hr *in vitro* in the presence of *Ypd1*. Higher osmolyte concentrations decrease the *Ssk1*~P half-life by two-fold in *in vitro* reactions, but this modest effect alone would not be sufficient to account for the rapid *in vivo* activation of the MAPK cascade (Kaserer *et al.* 2009). Therefore, the dephosphorylation of *Ssk1*~P might be accelerated under stress conditions *in vivo*, perhaps by an as-yet-unknown phosphatase.

The *actin* cytoskeleton is important for the survival of yeast under osmotic stress, as many mutations in *actin* cause osmosensitivity (Wertman *et al.* 1992). Hyperosmotic stress causes a rapid disassembly of *actin* cables, followed by depolarization of *actin* patches leading to a cell-cycle delay (Chowdhury *et al.* 1992). The reassembly of the *actin* cytoskeleton occurs only after osmotic balance is re-established (Brewster and Gustin 1994). During osmotic stress, *Ssk2* concentrates in the neck of budding cells and forms a complex with *actin*, and following reestablishment of osmotic balance, *Ssk2* promotes *actin* cytoskeleton recovery (Yuzyuk *et al.* 2002). This recovery mechanism requires a polarized distribution of *Ssk2*, its *actin*-interacting activity and its kinase catalytic activity, but, interestingly, does not require *Ssk1* (Yuzyuk and Amberg 2003; Bettinger *et al.* 2007). Although *Ssk1* is the only known activator of *Ssk2/Ssk22*, osmotic stress does cause slight activation of the *Hog1* MAPK in *ssk1Δ sho1Δ* mutants, whereas no activation is observed in *ssk2Δ ssk22Δ sho1Δ* mutants (Maeda *et al.* 1994; Reiser *et al.* 2000). These findings suggest that there may be an as-yet-unknown mechanism that can activate *Ssk2/Ssk22* without *Ssk1*.

***Ssk2/Ssk22-Pbs2-Hog1* kinase cascade:** Once activated, the *Ssk2/Ssk22* MAPKKK initiates a kinase cascade reaction that involves the *Pbs2* MAPKK and the *Hog1* MAPK (Boguslawski 1992; Brewster *et al.* 1993). Although there are several other MAPKKs and MAPKs in yeast with similar sequences, activated *Ssk2/Ssk22* exclusively phosphorylates, and thereby

activates, *Pbs2*, and activated *Pbs2* phosphorylates only *Hog1*. These specific interactions are due to the presence of specific docking sites in *Pbs2*. An *Ssk2/Ssk22*-specific docking site is located in the *Pbs2* N-terminal regulatory region (Tatebayashi *et al.* 2003). Fusion of this *Pbs2* docking site to the *Ste7* MAPKK, which is not a substrate of *Ssk2/Ssk22*, allows phosphorylation of *Ste7* by *Ssk2/Ssk22*. *Pbs2* has two specific binding sites for *Hog1*: one is in the N-terminal regulatory region, and another is near the C-terminus (Murakami *et al.* 2008).

The activity of wild-type *Hog1* is absolutely dependent on double phosphorylation of its TGY motif by *Pbs2*. However, several *Hog1* mutants that are partially active without any phosphorylation by *Pbs2* have been isolated (Bell *et al.* 2001; Bell and Engelberg 2003). By using these mutants, *Hog1*-dependent effects can be studied without exposing cells to osmotic stress, which would induce both *Hog1*-dependent and -nondependent effects (Yaakov *et al.* 2003).

Stress-responsive MAPK cascades that are homologous to the *Hog1* MAPK cascade are found in both lower and higher eukaryotes (Sheikh-Hamad and Gustin 2004). For example, the mammalian stress-responsive p38 MAPK is structurally highly similar to *Hog1*, and p38 can complement mutant strains of yeast that lack the *Hog1* MAPK (Han *et al.* 1994). Also, the kinase domain of the mammalian stress-responsive MAPKKK termed MTK1 (also known as MEKK4) is highly similar to the kinase domains of *Ssk2* and *Ssk22*, and expression of constitutively active MTK1-ΔN can complement the *ssk2Δ ssk22Δ* double mutation (Takekawa *et al.* 1997). MTK1 is activated by binding of its specific activator, Gadd45, in a manner similar to activation of *Ssk2* and *Ssk22* by *Ssk1*, although these activators are unrelated and not functionally exchangeable (Takekawa and Saito 1998; Mita *et al.* 2002; Miyake *et al.* 2007).

***Sln1-Ypd1-Skn7* multistep phosphorelay:** *Ypd1* donates its phosphoryl group not only to *Ssk1* but also to *Skn7* (Figure 4B). *Skn7* is composed of an N-terminal DNA-binding domain and a C-terminal REC domain and is highly conserved among fungi (Brown *et al.* 1994). A phosphotransfer reaction from *Sln1* to *Skn7* via the intermediary *Ypd1* was demonstrated *in vitro* (Li *et al.* 1998; Ault *et al.* 2002). Although *Skn7* is exclusively localized in the nucleus and *Ssk1* is mostly in the cytoplasm, *Ypd1* is found in both the nucleus and the cytoplasm, which is consistent with its ability to transfer phosphate to both *Skn7* and *Ssk1* (Lu *et al.* 2003). The *Sln1-Ypd1-Skn7* phosphorelay regulates a response that is complementary to that of the *Sln1-Ypd1-Ssk1* phosphorelay: whereas *Ssk1* is activated under hyperosmotic conditions, *Skn7* is activated under hypo-osmotic conditions. *Skn7* regulates oxidative stress-responsive genes, and *skn7Δ* mutants are hypersensitive to oxidative stresses such as exposure to hydrogen peroxide (Krems *et al.* 1996; Raitt *et al.* 2000a). However, the role of *Skn7* in oxidative responses is not dependent on *Sln1*, and the phospho-accepting Asp-427 of *Skn7* is not required (Morgan *et al.* 1997; He *et al.* 2009).

In contrast, induction of hypo-osmotic stress responsive genes, such as *OCH1*, is dependent on *Sln1* and requires the Asp-427 of *Skn7* (Ketela *et al.* 1998; Li *et al.* 2002; Shankarnarayan *et al.* 2008). *OCH1* encodes the mannosyltransferase in the *cis*-Golgi apparatus that initiates N-linked glycosylation of secreted/membrane proteins and thus is a key enzyme in cell-wall maintenance. Although the *skn7Δ* mutants are not osmosensitive, the suppression of the hypo-osmotic stress sensitivity of a *pkc1Δ* mutant by *SKN7* overexpression suggests that *Skn7* and the PKC pathway coordinately regulate cell-wall integrity that is critical for growth under hypo-osmotic conditions (Brown *et al.* 1994). For more details on *Skn7*, see a recent comprehensive review by Fassler and West (2011).

### *Sho1* branch of the HOG pathway

Unlike the *Sln1* branch, which is a variation of the well-understood two-component paradigm, the activation mechanism of the *Sho1* branch is still only vaguely defined. Although many important observations have been made, there is still a lack of a unifying mechanism that incorporates all of the separate facts. Thus, we will first present an overview of the current hypothesis of how the *Sho1* branch might be activated and will then discuss the details of individual steps in the following sections.

**Overview:** A signaling response in the *Sho1* branch is initiated by the putative osmosensors *Msb2* and *Hkr1*, which are highly glycosylated single-pass TM proteins (Tatebayashi *et al.* 2007). Through an as-yet-undefined mechanism that seems to involve an interaction between the *Msb2/Hkr1* osmosensors and the *Sho1* co-osmosensor, this response leads to activation of the PAK-like kinases *Ste20* and *Cla4* by inducing their association with the membrane-bound small G-protein *Cdc42* (Lamson *et al.* 2002). Activated *Ste20/Cla4* then phosphorylates and activates the *Ste11* MAPKKK (Raitt *et al.* 2000b; van Drogen *et al.* 2000), which in turn phosphorylates and activates the *Pbs2* MAPKK that is associated with the *Sho1* membrane anchor (Maeda *et al.* 1995; Tatebayashi *et al.* 2006). Because both the *Cdc42-Ste20* and the *Sho1-Pbs2* complexes are localized on the membrane, *Ste11* must also be localized to the membrane so that efficient activator/substrate interactions between *Ste20* and *Ste11*, as well as between *Ste11* and *Pbs2*, can take place. Membrane localization of *Ste11* is mediated by the *Ste50* adaptor protein, which forms a stable complex with *Ste11* (Posas *et al.* 1998; Wu *et al.* 1999), primarily via association of *Ste50* with the membrane anchor protein *Opy2* (Ekiel *et al.* 2009; Yamamoto *et al.* 2010), and secondarily by *Ste50-Cdc42* and *Ste50-Sho1* interactions (Tatebayashi *et al.* 2006; Truckses *et al.* 2006). Activation of the *Hog1* MAPK by *Pbs2* seems to proceed as in the *Sln1* branch.

**Putative osmosensors *Msb2* and *Hkr1*:** Both *Msb2* and *Hkr1* are highly glycosylated single-path transmembrane proteins (Figure 5). The extracellular domains of these

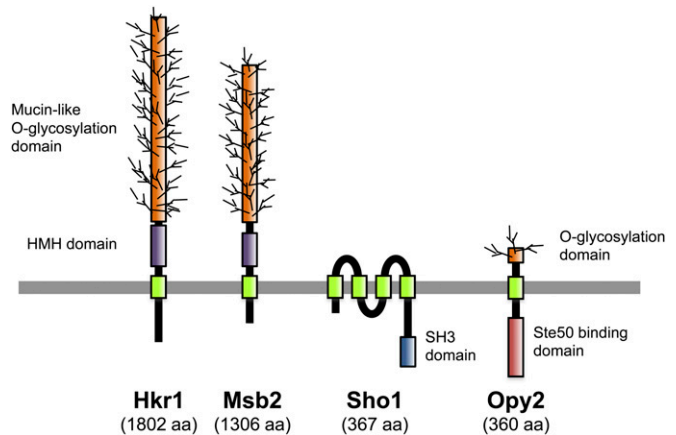

**Figure 5** Schematic representations of the four transmembrane proteins involved in the *Sho1* branch of the HOG pathway. HMH, *Hkr1*-*Msb2* homology domain. Not drawn to scale.

proteins are highly Ser/Thr rich and contain numerous O-glycosylation sites that are glycosylated by the protein O-mannosyl transferase *Pmt4* (Yang *et al.* 2009). The *MSB2* gene was originally identified as a multicopy suppressor of a *cdc24* mutant (Bender and Pringle 1989). Since *Cdc24* is a guanine exchange factor for *Cdc42*, it is believed that *Msb2* somehow regulates the activity of *Cdc24* or *Cdc42*. Indeed, a weak binding between *Msb2* and *Cdc42* has been observed (Cullen *et al.* 2004). However, how *Msb2* controls *Cdc42* activity is unclear.

The possible involvement of *Msb2* in the HOG pathway was initially suggested by the observation that the weak osmo-tolerance of the *ssk1Δ sho1Δ* mutant was abolished in the *ssk1Δ sho1Δ msb2Δ* triple mutant (O'Rourke and Herskowitz 2002). This observation was interpreted at that time as indicating that *Msb2* is a third osmosensor in the HOG pathway (*Sln1* and *Sho1* being the other two). A later study, however, revealed that *Msb2* and another transmembrane glycoprotein, *Hkr1*, are the more likely osmosensors in the *Sho1* branch, but that *Sho1* itself has a downstream function as a co-osmosensor (Tatebayashi *et al.* 2007). This conclusion is partly based on genetic epistasis tests that indicated that *MSB2/HKR1* functions upstream of *SHO1*: a constitutively active *SHO1* mutant can activate *Hog1* MAPK even in the *msb2Δ hkr1Δ* double-mutant cells, but a constitutively active *MSB2* or *HKR1* mutant cannot activate *Hog1* in a *sho1Δ* mutant.

The Ser/Thr-rich glycosylation domains of *Msb2* and *Hkr1* have a negative regulatory function, as their deletion converts *Msb2* and *Hkr1* into constitutively active forms (Cullen *et al.* 2004; Tatebayashi *et al.* 2007). Furthermore, inhibition of O-glycosylation by *pmt4Δ* mutation, together with inhibition of N-glycosylation by tunicamycin, activates the *Hog1* MAPK cascade in an *Msb2*-dependent manner (Yang *et al.* 2009). Based on these observations, two possible mechanisms of activating these osmosensors have been proposed. One is by proteolytic cleavage in the extracellular domain by the aspartyl protease *Yps1*, which eliminates the

Ser/Thr-rich glycosylation domain (Vadaie *et al.* 2008). Another is by an osmstress-induced conformational change in the oligosaccharide structure (Tatebayashi *et al.* 2007). However, the actual mechanism remains unclear.

**Co-osmosensor Sho1:** The *SHO1* gene was initially identified by isolation of mutants that are synthetically high osmolarity sensitive in the presence of mutations that inactivate the *Sln1* branch of the HOG pathway (Maeda *et al.* 1995). *Sho1* is a relatively small protein (367 aa) that is composed of an N-terminal bundle of four transmembrane segments (TM1–TM4) and a C-terminal, cytoplasmic SH3 domain (Figure 5). The *Sho1* SH3 domain binds to a Pro-rich motif (KPLPPLPV) in the N-terminal regulatory region of *Pbs2* and serves to localize *Pbs2* to the membrane (Maeda *et al.* 1995). Of the 27 SH3 domains found in the yeast proteome, only the *Sho1*-SH3 binds *Pbs2*, indicating a very high level of selectivity (Zarrinpar *et al.* 2003). The *Sho1*–*Pbs2* interaction is required for activation of *Pbs2* by the *Ste11* MAPKKK. The *Sho1* SH3 domain can also bind to Pro-rich motifs in *Fus1* (KPLPLTPN) (Nelson *et al.* 2004) and in *Ste20* (QPLPPIPP) (K. Tanaka, K. Tatebayashi, H.-Y. Yang, and H. Saito, unpublished results). Thus, during a mating response, induced *Fus1* might downregulate the *Sho1* branch by competitively inhibiting the *Sho1*–*Pbs2* interaction. The role of the *Sho1*–*Ste20* interaction seems to be redundant with that of other signaling elements in the *Sho1* branch because this Pro-rich motif in *Ste20* is required for activation of the *Sho1* branch only in some mutants, but not in wild-type cells.

A few lines of evidence suggest that *Sho1* might serve additional roles in signaling other than membrane targeting of *Pbs2* and *Ste20*. First, *Pbs2* appears to dissociate from *Sho1* upon activation of the *Pbs2* MAPKK, as suggested by decreased membrane localization of *Pbs2* following osmstress stimulation, and this dissociation is hindered in a *ste20Δ* or a *ste11Δ* mutant or in a *pbs2Δ* mutant in which a catalytically inactive *Pbs2*-K389M is expressed, but interestingly not in a *hog1Δ* mutant (Reiser *et al.* 2000). These observations suggest that the *Sho1*–*Pbs2* interaction might be dynamically regulated by a feedback phosphorylation by activated *Pbs2*. Second, an experimental replacement of the *Sho1* SH3 domain with another SH3 domain derived (and modified) from the Fyn kinase resulted in a hybrid *Sho1* that bound to *Pbs2* just as well as the wild-type *Sho1*. Nonetheless, such a hybrid *Sho1* is functionally defective, implying that the *Sho1* SH3 domain has other functions in addition to *Pbs2* binding (Marles *et al.* 2004). Third, and possibly related to the previous point, several proteins, notably *Ste11* and *Ste50*, have been shown to interact with *Sho1*, but this binding is independent of the Pro-rich-motif-binding ability of the *Sho1* SH3 domain (Zarrinpar *et al.* 2004; Tatebayashi *et al.* 2006). These interactions might enable *Ste11* to efficiently interact with *Pbs2* that is associated with *Sho1*. Finally, there are a number of *Sho1* mutants that are constitutively activated in the sense that their expression will

activate the *Hog1* MAPK in the absence of any osmstress (Tatebayashi *et al.* 2006, 2007; Vadaie *et al.* 2008). These mutations are found both in the TM region and in the cytoplasmic region, suggesting that *Sho1* might engage in dynamic interaction with other molecules through both its TM and cytoplasmic regions. Thus, the potentially dynamic functions of *Sho1* are still far from being understood.

**Adaptor protein Ste50:** *STE50* was originally identified as a gene that is required for an efficient mating response, as its deletion mutants are moderately sterile (Ramezani Rad *et al.* 1992; Xu *et al.* 1996). *Ste50* is essential for the *Sho1* branch of the HOG pathway (Posas *et al.* 1998; Wu *et al.* 1999) and is also necessary for the filamentous and invasive growth pathway that activates the *Kss1* MAPK (Ramezani Rad *et al.* 1998; Jansen *et al.* 2001). Thus, all three signal pathways that involve *Ste11* are dependent on *Ste50*. Structurally, *Ste50* is composed of an N-terminal sterile- $\alpha$  motif (SAM) domain and a C-terminal Ras association (RA) domain (Ramezani-Rad 2003) (Figure 6). A SAM domain is a protein interaction module of  $\sim 70$  amino acids that can homo-dimerize and hetero-oligomerize with other SAM domains (Qiao and Bowie 2005). *In vivo* binding studies have shown that the *Ste50* SAM domain binds to the SAM domain in *Ste11* (Posas *et al.* 1998; Wu *et al.* 1999; Jansen *et al.* 2001), while *in vitro* studies demonstrated that the *Ste50* SAM domain can homo-dimerize as well as hetero-dimerize with *Ste11* SAM (Bhattacharjya *et al.* 2004; Grimshaw *et al.* 2004; Kwan *et al.* 2004, 2006). The SAM-mediated *Ste50*–*Ste11* interaction is essential for all the known activities of *Ste50* (Ramezani-Rad 2003).

In spite of its name, the *Ste50* RA domain does not seem to interact with Ras proteins. Genetic evidence suggests that the RA domain might interact with the *Cdc42* GTPase, which is supported by a coprecipitation assay that showed that the *Ste50* RA domain interacted equivalently with either GTP- or GDP-bound *Cdc42* (Tatebayashi *et al.* 2006; Truckses *et al.* 2006). A *Ste50* mutant that lacks the RA domain (*Ste50*- $\Delta$ RA) is functionally defective and cannot activate the *Hog1* MAPK in response to osmstress. However, forced localization of *Ste50*- $\Delta$ RA to the plasma membrane, by attachment of a membrane-targeting signal, results in efficient activation of the *Hog1* MAPK, indicating that an essential function of the RA domain is to aid *Ste50* membrane localization (Tatebayashi *et al.* 2006; Truckses *et al.* 2006; Wu *et al.* 2006). In wild-type cells, *Ste50* membrane localization could be attained, in principle, by an interaction of the *Ste50* RA domain with the membrane-associated *Cdc42* GTPase. However, the major factor that recruits *Ste50* to the membrane appears to be the membrane anchor protein *Opy2* (Wu *et al.* 2006; Yamamoto *et al.* 2010). Importantly, membrane-targeting of *Ste50*- $\Delta$ RA, using the Ras C-terminal prenylation signal, can rescue the osmstress-induced *Hog1* activation in the absence of *Opy2*, implying that the *Ste50*–*Opy2* interaction and resulting *Ste50* membrane localization is the main function of the



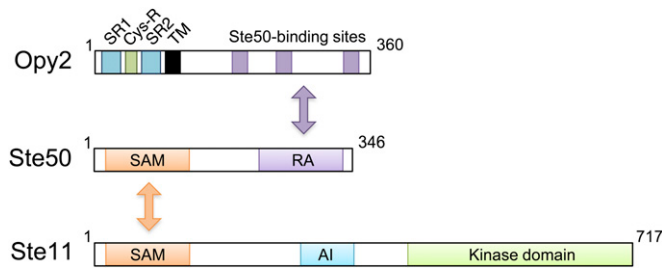

**Figure 6** Schematic diagram of the Ste11/Ste50/Opy2 complex. Ste11 and Ste50 bind together through their SAM domains, whereas the RA domain of Ste50 binds to any of three binding sites in Opy2. AI, auto-inhibitory domain; Cys-R, cysteine-rich domain; SR, Serine rich domain; TM, transmembrane domain.

**Ste50 RA domain** (Tatebayashi *et al.* 2007). Ste50 has also been shown to interact with the membrane protein Sho1 (Tatebayashi *et al.* 2006), but the roles of Ste50–Sho1 interaction in signaling remain to be determined. In summary, the main function of Ste50 seems to be to serve as an adaptor between the Ste11 MAPKKK and the membrane anchor Opy2, so that Ste11 is efficiently recruited to the membrane.

**Membrane anchor Opy2:** The *OPY2* gene was initially identified as a multicopy suppressor that downregulates the mating MAPK signal pathway (Edwards *et al.* 1997). However, disruption of *OPY2* does not have any significant impact on the mating pathway. It was later found that the *opy2Δ* mutation, together with a defect in the *Sln1* branch, causes synthetic osmosensitivity, indicating that Opy2 has an essential function in the Sho1 branch of the HOG pathway (Wu *et al.* 2006).

Opy2 is a single-path transmembrane protein of 360 aa. Its short extracellular domain is composed of, from the N terminus, a highly Ser-rich (SR1) domain, a Cys-rich (Cys-R) domain, and another Ser-rich (SR2) domain followed by the TM segment (Figure 6). The SR1 domain, but not SR2, is highly *O*-glycosylated by the protein *O*-mannosyl transferase *Pmt4*, but deletion of SR1 does not have any observable effect on Opy2 functions (Hutzler *et al.* 2007; Yang *et al.* 2009). The Cys-R domain is characterized by an arrangement of eight cysteine residues, and genes that encode a similar Cys-rich motif are found in a wide range of fungal species. The cytoplasmic region of Opy2 is intrinsically disordered as revealed by NMR spectroscopy (Ekiel *et al.* 2009) and comprises four short well-conserved regions (CR-A to CR-D) interspersed among nonconserved sequences (Yamamoto *et al.* 2010).

The essential function of Opy2 in the Sho1 branch is to recruit the Ste50/Ste11 complex to the plasma membrane. Earlier studies suggested that there is more than one Ste50-binding site in Opy2 (Wu *et al.* 2006; Ekiel *et al.* 2009). A more recent study extended this hypothesis and showed that there are actually three independent Ste50-binding sites in Opy2, which correspond to the conserved regions CR-A, CR-B, and CR-D. CR-A and CR-D seem to constitutively bind Ste50, whereas CR-B (DIRSHITLGSSIL) binds Ste50 only

when the Ser and Thr residues are phosphorylated by the casein kinase I isoforms, Yck1 and Yck2 (Yamamoto *et al.* 2010). Yck1/Yck2 are activated when glucose availability is high (Zaman *et al.* 2008). In fact, Opy2 CR-B is phosphorylated only when there is abundant glucose in the media. Opy2 is required not only for the Sho1 branch, but also for the FIG pathway, which is activated under limited nutrition and activates the Kss1 MAPK. Interestingly, CR-B seems to function only in the Hog1 pathway, but not in the FIG pathway. Thus, it is possible that under glucose-rich environments the phosphorylation of CR-B shifts Opy2 activity away from Kss1 and toward Hog1.

In summary, the main function of Opy2 is to serve as a membrane anchor for the Ste11 MAPKKK through its binding to the adaptor protein Ste50. Opy2 also integrates signals from the osmosensors and the glucose sensors.

**Activation of Ste20/Cla4:** Ste20 is a member of the p21-activated kinase (PAK) family of protein kinases that are activated by the small GTPase Cdc42 (Bokoch 2003). In the absence of stimuli, PAK family kinases are inhibited by their N-terminal auto-inhibitory domain that binds to their C-terminal kinase domain (Lei *et al.* 2000). This auto-inhibition is relieved when GTP-bound (activated) Cdc42 binds to the p21-binding domain termed “CRIB” that is close to the auto-inhibitory domain (Peter *et al.* 1996; Leberer *et al.* 1997; Lamson *et al.* 2002; Ash *et al.* 2003). Ste20 was initially identified as a kinase that is required to activate the Ste11 MAPKKK in the mating signal pathway (Leberer *et al.* 1992). Later, Ste20 was shown to participate in two other signal pathways, the FIG and the Sho1 branch of the HOG pathway (Mösch *et al.* 1996; O’Rourke and Herskowitz 1998; Raitt *et al.* 2000b). Cla4 is another PAK family kinase and is involved mainly in cell-cycle regulation, such as septin formation and polarized growth (Tjandra *et al.* 1998). Although both *ste20Δ* and *cla4Δ* mutants are viable, the *ste20Δ cla4Δ* double mutation is lethal (Cvrcková *et al.* 1995). Thus, it is believed that Ste20 and Cla4 share at least one essential function, although the nature of that essential function is not known.

The growth of *ste20Δ* mutants of a parental strain that is defective in the Sln1 branch, such as *ssk2Δ ssk22Δ*, is sensitive to high osmolarity, but these mutants can tolerate moderate osmotic stress (Raitt *et al.* 2000b). In contrast, *ste20Δ cla4<sup>ts</sup>* double mutants of the same strain are highly osmosensitive and are completely unable to activate Hog1, indicating that Cla4 partially compensates for the function of Ste20 (Tatebayashi *et al.* 2006). The finding that *ste20Δ (ΔCRIB)* mutants are more osmosensitive than the STE20 wild-type parental cells seems to indicate that Cdc42 binding to Ste20 is required for activation and/or membrane localization of Ste20 (Raitt *et al.* 2000b; Winters *et al.* 2005). However, overexpression of constitutively active *cdc42(G12V)* only very moderately activates Hog1, suggesting that an additional factor might be necessary for full activation of Ste20 (Raitt *et al.* 2000b). Although it is

frequently assumed that GTP association of *Cdc42* is increased and that *Ste20* kinase is activated in response to osmostress, there is no direct evidence for these assumptions. An alternative mechanism, in which osmostress induces the association of active *Ste20* (which has been activated by an osmostress-independent manner) and *Ste11*, might better fit the available data. Indeed, the mating MAPK pathway is activated by an analogous mechanism, *i.e.*, by pheromone-induced association of *Ste20* and *Ste11* (Pryciak and Huntress 1998; Lamson *et al.* 2002).

**Activation of *Ste11* by *Ste20/Cla4*:** Activation of the *Ste11* MAPKKK by osmostress requires at least two events. The first event is the binding of *Ste50* to the *Ste11* N-terminal SAM domain. This interaction helps to dissociate the N-terminal inhibitory domain from the C-terminal kinase catalytic domain, thus relieving inhibition of the kinase (Wu *et al.* 1999). However, as the *Ste11–Ste50* interaction is constitutive, this effect is not likely to play an active role in regulating *Ste11* activity during osmostress. The second event that is required is phosphorylation of *Ste11* by *Ste20/Cla4*. It has been demonstrated that, in response to  $\alpha$ -mating factor, activated *Ste20* phosphorylates Ser-302, Ser-306, and Thr-307 in the N-terminal regulatory region of *Ste11* (van Drogen *et al.* 2000). Based on the effects of phospho-mimetic mutations, it is believed that these *Ste11* sites are also phosphorylated by *Ste20/Cla4* upon osmostress stimulation (Lamson *et al.* 2006).

*Ste50* binding and phosphorylation by *Ste20/Cla4* are important, but not sufficient for *Ste11* to transmit signals to downstream elements. Phospho-mimetic substitutions at the phosphorylation sites, or mutations in the auto-inhibitory domain, or even a deletion of the entire N-terminal regulatory region, all constitutively activate *Ste11*. Overexpression of one of these constitutively active *Ste11* mutants activates both the *Ste11–Pbs2–Hog1* and the *Ste11–Ste7–Fus3/Kss1* MAPK cascades, without any stimulation (Posas and Saito 1997; Lamson *et al.* 2006; Tatebayashi *et al.* 2006). However, expression of the same constitutively active *Ste11* mutants using the native *STE11* promoter does not significantly activate the *Hog1* MAPK or the *Fus3/Kss1* MAPK (Lamson *et al.* 2006; Tatebayashi *et al.* 2006). Constitutively active *Ste11* mutants do activate the *Hog1* MAPK cascade and the mating MAPK cascade in a *Ste20/Cla4*-independent manner upon respective stimulation (Lamson *et al.* 2006; Tatebayashi *et al.* 2006). Thus, it is clear that, in addition to activation of *Ste11* by *Ste20/Cla4*, another stimulus-dependent signal amplification step is required to transmit sufficient signal to the downstream component (*Pbs2* in the case of the HOG pathway and *Ste7* in the cases of the mating and FIG pathways). The nature of this amplification step is unclear, but one possibility is a stimulus-induced membrane localization of activated *Ste11* (Lamson *et al.* 2006).

**Activation of *Pbs2* by *Ste11*:** *Ste11* can be activated by any of the three MAPK cascades: the osmoregulatory HOG path-

way, the mating pathway, and the FIG pathway. When activated by osmostress, however, *Ste11* activates only the *Pbs2* MAPKK, while in the other pathways *Ste11* activates the *Ste7* MAPKK. Thus, there must be a mechanism that allows only *Pbs2* to be activated by *Ste11* during osmotic stimulation. As discussed earlier, *Pbs2* is recruited to the plasma membrane by the membrane-associated scaffold protein *Sho1* (Maeda *et al.* 1995; Reiser *et al.* 2000), and the *Ste11/Ste50* complex is recruited to the membrane by the membrane anchor protein *Opy2* (Wu *et al.* 2006; Ekiel *et al.* 2009; Yamamoto *et al.* 2010). However, efficient activation of *Pbs2* by *Ste11* seems to require, in addition to their membrane localization, direct and indirect docking interactions between *Ste11* and *Pbs2*. It is known that *Ste11* and *Pbs2*, *Ste11* and *Sho1*, *Ste50* and *Sho1*, and possibly *Opy2* and *Sho1* bind to each other (Posas and Saito 1997; Zarrinpar *et al.* 2004; Tatebayashi *et al.* 2006). Thus, multiple interactions between the *Opy2/Ste50/Ste11* complex and the *Sho1/Pbs2* complex bring *Ste11* in close contact with *Pbs2* for efficient activation. The relative contributions of these interactions to *Pbs2* activation, as well as their regulation by osmostress, remain to be determined.

#### Activation of the HOG pathway by non-osmotic stresses

A number of non-osmotic stresses are known to activate the HOG pathway, including cold stress (Hayashi and Maeda 2006; Panadero *et al.* 2006), heat stress (Winkler *et al.* 2002), hypoxia (Hickman *et al.* 2011), arsenite (Sotelo and Rodríguez-Gabriel 2006; Thorsen *et al.* 2006), acetic acid (Mollapour and Piper 2006, 2007), low pH (Kapteyn *et al.* 2001), inhibition of glycosylphosphatidylinositol (GPI) anchor synthesis (Toh-E and Oguchi 2001), and inhibition of sphingolipid synthesis (Tanigawa *et al.* 2012). In most cases, *Hog1* is only moderately activated, and the kinetics of *Hog1* phosphorylation is different from those observed upon osmostress. Although it is unclear how *Hog1* is activated by these stresses, such stresses often activate either the *Sln1* branch or the *Sho1* branch, but not both. Adaptation to these diverse stresses, in addition to osmostress, might explain why yeast has apparently redundant osmostress-signaling branches. In this context, it is worth noting that the *Aspergillus nidulans* HogA MAPK (a homolog of *Hog1*) is activated only by the two-component signaling pathway homologous to the *Sln1* branch, even though the mold has a *Sho1* homolog (Furukawa *et al.* 2005).

#### Nuclear transport of activated *Hog1*

*Hog1* rapidly accumulates in the nucleus following osmotic stress (Figure 7A). *Hog1* is then exported back to the cytoplasm after return to an iso-osmotic environment or after adaptation to high osmolarity (Ferrigno *et al.* 1998; Reiser *et al.* 1999). The kinetics of the transient *Hog1* nuclear localization closely correlate with those found for the dual phosphorylation of *Hog1* at Thr-174 and Tyr-176 (Figure 7B). Indeed, *Hog1* mutations at these amino acid positions prevent *Hog1* translocation into the nucleus (Ferrigno *et al.*

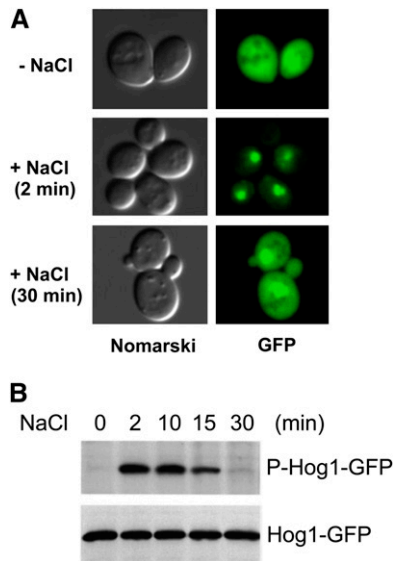

**Figure 7** Transient phosphorylation and nuclear localization of the Hog1 MAPK after osmostress. GFP-tagged Hog1 (Hog1-GFP) was expressed in a *hog1Δ* host strain, and cells were exposed to 0.4 M NaCl for the time indicated. (A) Hog1-GFP was detected by fluorescence microscopy (GFP), while the cell shape was pictured by differential interference contrast microscopy (Nomarski). (B) Total Hog1-GFP and phosphorylated Hog1-GFP were detected by immunoblotting using, respectively, anti-GFP and anti-phosphotyrosine antibody. Modified from Ferrigno *et al.*, 1998.

1998; Reiser *et al.* 1999). Hog1 phosphorylation itself, however, is not sufficient for its nuclear localization because the constitutively phosphorylated Hog1 molecules in the *ptp2Δ ptc1Δ* double-mutant cells do not accumulate in the nucleus (Mattison and Ota 2000). Catalytically inactive Hog1 mutants, such as D144A, cannot translocate into the nucleus after hyper-osmotic stimulation (Westfall and Thorner 2006). In contrast, other catalytic site mutants that retain partial activity, such as K52R or K52M, not only translocate into the nucleus, but also even fail to be exported out of the nucleus (Ferrigno *et al.* 1998; Mattison and Ota 2000). Thus, Hog1 catalytic activity seems to be required for its nuclear import and/or export, but its precise role remains unclear. Strains that lack the general stress activators *Msn2* and *Msn4*, the related transcription factors *Msn1* and *Hot1*, or the nuclear protein tyrosine phosphatase *Ptp2* accumulate less Hog1 in the nucleus than wild-type cells, suggesting that these molecules bind and retain Hog1 in the nucleus (Reiser *et al.* 1999; Rep *et al.* 1999b; Mattison and Ota 2000).

Nuclear import of Hog1 is partially dependent on the activity of *Gsp2* (homolog of mammalian Ran GTPase) and *Nmd5* (homolog of importin  $\beta$ ), but not on that of *Srp1* and *Rsl1*, which encode the nuclear localization signal (NLS)-binding importin  $\alpha/\beta$  heterodimer (Ferrigno *et al.* 1998). This result is consistent with the fact that Hog1 does not contain a classical NLS. Nuclear export of Hog1 requires the activity of the nuclear export signal (NES) receptor *Xpo1/Crm1* (Ferrigno *et al.* 1998).

Nuclear localization is necessary for Hog1 to phosphorylate its nuclear substrates, including transcription factors and

cell-cycle regulators. Indeed, cells that express plasma membrane-tethered Hog1 (Hog1-CCAAX), which cannot translocate to the nucleus, seem to have deficient expression of the Hog1-dependent genes (Westfall *et al.* 2008). Strikingly, however, membrane-tethered Hog1 permits robust growth under conditions of hyper-osmotic stress, suggesting that Hog1-mediated cytoplasmic modulation of metabolic activities, perhaps those that are necessary for glycerol synthesis and accumulation, are more important for long-term cell survival than alteration of the gene expression pattern (Bouwman *et al.* 2011).

Unlike Hog1, the Hog1-activating kinase *Pbs2* is found mostly in the cytoplasm of both unstressed and osmostress-stimulated cells (Ferrigno *et al.* 1998). Nevertheless, *Pbs2* has an NES at its N terminus (residues 4–18) and an NLS at its C terminus (residues 636–639). *Pbs2*  $\Delta$ NES mutants accumulate in the nucleus, whereas *Pbs2*  $\Delta$ NES  $\Delta$ NLS double mutants are found in the cytoplasm (Tatebayashi *et al.* 2003). Thus, it is likely that *Pbs2* shuttles between the two compartments, but the function of such shuttling is unknown.

### Dynamics of HOG pathway signaling

The Hog1 MAPK is only transiently activated following osmostress stimulation. Phosphorylation of the Hog1 activation sites (TGY) increases rapidly, reaches a maximal level at  $\sim$ 5 min, and then gradually decreases to near basal levels within 30 min (Maeda *et al.* 1995; Hao *et al.* 2007) (Figure 7B). This negative regulation is dependent on the kinase activity of Hog1 itself because phosphorylation of catalytically inactive Hog1 persists much longer than that of wild-type Hog1 (Wurgler-Murphy *et al.* 1997). Several negative-feedback mechanisms are known in the HOG pathway. Furthermore, the Hog1 MAPK pathway is part of a complex signaling network that involves at least two other MAPK pathways. The dynamic characteristics of this signal network are intensely investigated both by conventional genetic/biochemical approaches and by more recent systems biological and computational approaches.

**Negative feedback by glycerol accumulation:** The most important negative feedback mechanism of Hog1 pathway signaling is removal of the osmostress by induced accumulation of the compatible solute glycerol (Brewster *et al.* 1993; Albertyn *et al.* 1994; Klipp *et al.* 2005; Muzzey *et al.* 2009). Although transcriptional induction of *GPD1* and other genes necessary for glycerol accumulation is important for long-term downregulation of the Hog1 pathway, such induction takes too long (at least 15 min) to account for the rapid decline of Hog1 activity (Hirayama *et al.* 1995). It has been proposed that Hog1 might more rapidly regulate glycerol accumulation by directly modulating the activities of the glycerol channel *Fps1* and metabolic enzymes involved in glycerol biosynthesis (Dihazi *et al.* 2004; Klipp *et al.* 2005; Mollapour and Piper 2007; Westfall *et al.* 2008; Beese *et al.* 2009; Bouwman *et al.* 2011).

**Negative feedback by protein phosphatases:** Although signaling from the upstream osmosensors stops when osmotic imbalance is eliminated by glycerol accumulation, it is still necessary to inactivate the kinases by dephosphorylation to bring the system to the prestimulation state. The two activating phosphorylation sites in *Hog1*, namely Thr-174 and Tyr-176, are dephosphorylated by different enzymes (for reviews, see Saito and Tatebayashi 2004; Martín *et al.* 2005).

Members of the type 2C Ser/Thr phosphatase family, *Ptc1*, *Ptc2*, and *Ptc3*, dephosphorylate Thr-174. Of these phosphatases, *Ptc1* is the most important for de-activation of *Hog1*, as the *ptc1*Δ mutant retains high *Hog1* activity even after 1 hr (Warmka *et al.* 2001). The specificity of *Ptc1* toward *Hog1* is indirectly conferred by the adaptor protein *Nbp2* (Mapes and Ota 2004). *Nbp2* binds to both *Ptc1* and *Pbs2*, and as *Pbs2* also has a high affinity for *Hog1*, *Ptc1* is indirectly recruited to *Hog1* by the *Nbp2*–*Pbs2* complex. In contrast, *Ptc2* and *Ptc3* seem to have more of a subsidiary role of limiting the maximal activity of *Hog1* during activation (Young *et al.* 2002).

Members of the protein tyrosine phosphatase family, *Ptp2* and *Ptp3*, dephosphorylate Tyr-176 (Jacoby *et al.* 1997; Wurgler-Murphy *et al.* 1997). Although these tyrosine phosphatases are partially redundant, *Ptp2* is primarily responsible for *Hog1* dephosphorylation, whereas *Ptp3* is more important for *Fus3* dephosphorylation (Zhan and Guan 1999). *Ptp2* is found in the nucleus, whereas *Ptp3* is localized in the cytoplasm (Mattison and Ota 2000). This localization of *Ptp2* seems to ensure that tyrosine dephosphorylation of *Hog1* occurs only after *Hog1* has entered into the nucleus. Because *Hog1* is inactivated when either Thr-174 or Tyr-176 is dephosphorylated, the *ptc1*Δ *ptp2*Δ double-mutant strain is lethal because of *Hog1* hyperactivation (Maeda *et al.* 1993). Phosphatases that inactivate other kinases in the *Hog1* pathway have not been identified confidently.

**Negative feedback by phosphorylation of upstream elements:** Activated *Hog1* also negatively feedback regulates the *Hog1* pathway by phosphorylating upstream signaling elements. Osmostress-activated *Hog1* phosphorylates *Sho1* at Ser-166, which is located within the cytoplasmic linker region between the four TM domains and the C-terminal SH3 domain (Hao *et al.* 2007). *Hog1* activation is slightly diminished in cells expressing the phosphomimetic *Sho1*-S166E. It has been shown that some mutations at Ser-166 disrupt *Sho1* oligomerization. However, neither the role of Ser-166 phosphorylation in *Sho1* oligomerization, nor the role of *Sho1* oligomerization in *Hog1* activation, is clear.

Activated *Hog1* phosphorylates several amino acids in *Ste50* (Ser-155, Ser-196, Ser-202, Thr-244, Ser-248, and Thr-341) (Hao *et al.* 2008). Phosphorylation of *Ste50* reduces its affinity for the membrane anchor *Opy2* (Yamamoto *et al.* 2010). Because the *Opy2*–*Ste50* interaction is essential for *Hog1* activation via the *SHO1* branch, phosphorylation of *Ste50* by *Hog1* serves as a negative feedback mechanism. Indeed, the duration of *Hog1* activation by osmotic stress is longer in cells that express a phosphorylation-deficient *Ste50*

mutant than in the control cells. Pheromone-activated *Fus3* and *Kss1* also phosphorylate the same *Ste50* residues, suggesting that *Ste50* phosphorylation may also serve as a cross-regulatory mechanism between the mating and HOG pathways (Yamamoto *et al.* 2010).

**Inhibition of crosstalk among MAPK signaling pathways:** In general, each MAPK module is activated by specific types of stimuli and induces specific adaptive responses. To achieve this specificity would be easy if each MAPK module was composed of only unique and dedicated components. In yeast, however, three MAPK modules (the *Sho1* branch of HOG pathway, the mating pathway, and the FIG pathway) share many components, including the *Ste11* MAPKKK, and still maintain their individuality. Leakage of signal, or crosstalk, from one MAPK pathway to another is prevented by a number of mechanisms, in addition to the negative regulation that involves protein phosphatases (Saito 2010).

One mechanism is insulation of each MAPK pathway from the others by docking interactions and scaffold proteins (Reményi *et al.* 2005; Bardwell 2006; Dard and Peter 2006). Activation of the mating MAPK module (*Ste11* → *Ste7* → *Fus3*) is dependent on the presence of the *Ste5* scaffold (Elion 2001; Flatauer *et al.* 2005; Winters *et al.* 2005; Garrenton *et al.* 2006; Good *et al.* 2009). In contrast, activation of the *Sho1* branch of the *Hog1* MAPK module (*Ste11* → *Pbs2* → *Hog1*) is dependent on the presence of the *Sho1* scaffold (Maeda *et al.* 1995; Zarrinpar *et al.* 2004). Indeed, when a wild-type cell is costimulated with osmotic stress and a mating factor, dual activation of the HOG and the mating MAPK pathways occurred, indicating that these two MAPK modules are practically insulated and activated independently of each other (Patterson *et al.* 2010). The importance of docking and scaffold interactions in determining pathway specificity has also been demonstrated by artificially forcing interaction between non-native pairs of signaling elements, thus diverting the signaling flow into preselected directions (Harris *et al.* 2001; Park *et al.* 2003; Tatebayashi *et al.* 2003; Mody *et al.* 2009).

Another mechanism is cross-inhibition by one MAPK pathway of other MAPK pathways. Although the *Hog1* MAPK module (*Ste11* → *Pbs2* → *Hog1*) shares many upstream components with the FIG *Kss1* MAPK module (*Ste11* → *Ste7* → *Kss1*), osmotic stress activates the *Kss1* MAPK of the FIG pathway only very weakly and transiently (Shock *et al.* 2009; Wang *et al.* 2009), and glycosylation defects that activate *Kss1* do not activate *Hog1* (Cullen *et al.* 2000; Yang *et al.* 2009). In the absence of *Pbs2* or *Hog1*, however, osmotic stress activates *Kss1* robustly and *Fus3* to a lesser degree, induces *Kss1*/*Fus3*-dependent genes, and induces FIG/mating-like polarized cell growth (O'Rourke and Herskowitz 1998, 2004; Pitoniak *et al.* 2009). Using an ATP analog-sensitive *Hog1* mutant, it was shown that inhibition of this crosstalk requires *Hog1* kinase activity (Westfall and Thorner 2006). Although it is possible that a part of this crosstalk inhibition is achieved by modulation of FIG/mating-specific gene expression in the

nucleus (Shock *et al.* 2009), even a membrane-tethered version of *Hog1*, which, in principle, cannot enter the nucleus, can prevent this crosstalk, implying that a cytoplasmic substrate might be involved in this process (Westfall *et al.* 2008). However, cells expressing mutants of the known or suspected *Hog1* substrate proteins (*Sho1*, *Ste50*, *Opy2*, *Ste7*, *Tec1*, *Dig1/Dig2*, and *Rck1/Rck2*) that lack *Hog1*-dependent phosphorylation sites do not display constitutive crosstalk (Hao *et al.* 2007, 2008; Shock *et al.* 2009; Yamamoto *et al.* 2010). Thus, the mechanism of cross-inhibition between the HOG and FIG/mating pathways remains obscure.

**Single-cell dynamics:** Conventional methods used to detect MAPK activity such as immunostaining of fixed cells or immunoblotting of cell extracts using phospho-MAPK-specific antibodies can show only static snapshots and/or population averages of MAPK activation. To study the systems dynamics of a signaling pathway, it is necessary to monitor the behavior of single cells under controlled environmental conditions. The *Hog1* MAPK pathway is particularly suited for this type of analysis. By using a microfluidic device to change the osmolarity of media (input), and by monitoring the nuclear translocation of fluorescent protein-tagged *Hog1* (output), two groups have reported the frequency responses of HOG pathway activation (Hersen *et al.* 2008; Mettetal *et al.* 2008). At low frequency ( $<1/200 \text{ sec}^{-1}$ ), the HOG pathway faithfully follows the input changes, whereas at higher frequency, it responds only to the average input osmolarity. Other aspects of HOG-signaling properties have also been studied using various single-cell monitoring methods (McClellan *et al.* 2007; Muzzey *et al.* 2009; Patterson *et al.* 2010; Pelet *et al.* 2011).

**In silico simulation:** The HOG-signaling pathway is also an intense subject of *in silico* simulation, or mathematical modeling, that aims to elucidate system architecture, dynamics, and regulation based on data sets in the literature. Modeling is rapidly evolving from a simple tool that describes and summarizes the known facts into a more advanced predictive facility that can test the validity of various hypotheses (Klipp *et al.* 2005; Gat-Viks and Shamir 2007; Zou *et al.* 2007; Krantz *et al.* 2009; Rensing and Ruoff 2009; Zi *et al.* 2010; Parmar *et al.* 2011; Schaber *et al.* 2011). The popularity of the HOG pathway for such studies is undoubtedly because of its relative simplicity together with the availability of detailed mechanistic knowledge regarding this pathway and abundant quantitative and qualitative data. Thus, the HOG pathway will continue to be an excellent testing ground for algorithms that attempt to simulate and analyze more complex signal transduction networks in higher eukaryotes.

## Downstream Adaptive Responses

### Reestablishment of osmotic balance

**Compatible osmolytes:** Activation of *Hog1* in response to osmotic stress elicits a program for cell adaptation that includes

short- and long-term responses. Long-term adaptation involves transcriptional and translational regulation of the genome, whereas short-term adaptation is accomplished by changes in glycerol accumulation (Albertyn *et al.* 1994) and the reestablishment of ionic balance (Proft and Struhl 2004). Exposure to increased osmolarity is known to result in loss of water, shrinkage in cell size, and a temporary arrest of growth until adaptation occurs. The major strategy for survival under high osmolarity is to produce and accumulate compatible osmolytes such as glycerol to maintain the water balance and reestablish the volume and the turgor of the cells (Blomberg and Adler 1989; Hohmann *et al.* 2007; Westfall *et al.* 2008; de Nadal *et al.* 2011). The accumulation of compatible osmolytes is a ubiquitous mechanism in cellular osmoregulation. Although there are a number of compatible osmolytes such as trehalose, amino acids, and ions that contribute differently to adaptation to osmotic stress, glycerol seems to be the most important compatible osmolyte for the growth of *S. cerevisiae* in the presence of high osmolarity (Hohmann *et al.* 2007).

Intracellular accumulation of glycerol is an essential response for survival under high-osmolarity conditions, and the *Hog1* MAPK is responsible mainly for the accumulation of glycerol in the presence of high osmolarity (Albertyn *et al.* 1994). There are several mechanisms to control glycerol accumulation: regulation of gene expression, metabolic adjustment, and control of glycerol export and import (Hohmann 2002b).

**Glycerol accumulation:** The expression of key metabolic enzymes that are involved in glycerol, trehalose, and glycogen metabolism is upregulated in response to *Hog1* activation. The enzymes directly responsible for the synthesis of glycerol, *i.e.*, glycerol-3-phosphate dehydrogenase (*Gpd1*) and glycerol-3-phosphatases (*Gpp1* and *Gpp2*), are upregulated upon osmotic stress (see below), and the lack of these genes severely impairs growth at high osmolarity (Figure 8) (Hohmann 2002a). Expression of sugar transporters and genes involved in sugar metabolism are also upregulated in response to osmotic stress (Rep *et al.* 1999a, 2000; Gasch *et al.* 2000; Tomás-Cobos *et al.* 2004; Capaldi *et al.* 2008). However, some studies indicated that regulation of gene expression by *Hog1* is not absolutely required for cell survival under certain high-osmolarity conditions, especially at the initial phases of the stress and at medium osmolarity (Mettetal *et al.* 2008; Westfall *et al.* 2008). In contrast, other studies indicated that *Hog1*-dependent regulation of the expression of specific genes involved in glycerol metabolism is important for cell survival at high osmolarity over an extended period of time (Hohmann 2002b; de Nadal and Posas 2010; Martínez-Montañés *et al.* 2010).

Glycerol is rapidly accumulated in response to osmotic stress, starting within the first minute, and there is significant accumulation of glycerol after 30 min of exposure to high osmolarity (Klipp *et al.* 2005). This rapid increase in glycerol production cannot be attributed to an increase in

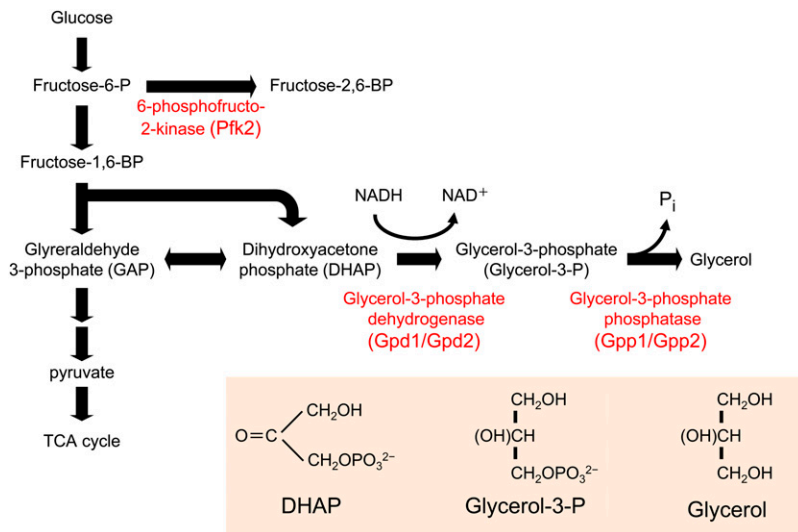

**Figure 8** Glycerol biosynthetic pathway. Glycerol is synthesized from an intermediate in the glycolysis, dihydroxyacetone phosphate (DHAP), by two-step enzymatic reactions. The first enzyme is glycerol-3-phosphate dehydrogenase (Gpd1/Gpd2), which reduces DHAP using NADH as reducing agent. The second enzyme is glycerol-3-phosphate phosphatase (Gpp1/Gpp2), which removes phosphate from glycerol-3-P to generate glycerol.

the transcription of particular genes, and therefore additional mechanisms other than transcriptional regulation must exist that permit such a rapid response. There are two main mechanisms to achieve such a rapid initial increase in glycerol concentration: changes in carbon metabolism and changes in glycerol transport.

**Metabolic adjustments:** Adaptation to osmotic stress requires direct metabolic adjustments. Cells must redirect carbon resources toward enhanced production of glycerol, and thus there is significant modulation of central carbon metabolism during osmo-adaptation. There are indications that regulation of glycolysis is crucial for osmotic adaptation; for example, cells deficient in glycerol synthesis are highly osmosensitive. The control of glycolysis and glycerol production appears to be distributed among several enzymes through allosteric control by different metabolites (Hohmann *et al.* 2007). However, there is direct evidence indicating that the activity of the 6-phosphofructo-2-kinase, Pfk2, which is responsible for controlling the levels of fructose-2,6-bisphosphate (F2,6BP), a key activator of glycolysis, is regulated by the Hog1 MAPK (Dihazi *et al.* 2004). Therefore, Hog1 may directly control the metabolic flux in response to stress. Along the same lines, recent studies using aerobic, glucose-limited cultures suggest that metabolic regulation rather than *de novo* enzyme synthesis dominates the initial phase of the adaptive process, at least in the presence of moderately high osmolarity (1 M sorbitol) (Bouwman *et al.* 2011). Therefore, the regulation of metabolic flux is an important component in Hog1-regulated glycerol accumulation.

**Glycerol transport:** Because the lipid bilayer has low permeability for glycerol, specific channel proteins mediate the rapid import and export of glycerol. As a consequence, the control of import and export rates is one mechanism by which the glycerol content inside of the cell can be altered. Thus, the control of the flux of glycerol through the membrane is another key factor for the initial accumulation

of glycerol upon osmotic stress. Stl1, a sugar transporter-like protein whose expression is strongly induced by Hog1 upon stress, might contribute to glycerol accumulation by importing glycerol from the environment in response to stress. However, the fastest mechanism to alter glycerol concentration is via Fps1-mediated glycerol export (Tamás *et al.* 1999). Fps1 is a member of the aquaporin family of transmembrane channels, and cells that express Fps1 mutant proteins that are constitutively open do not accumulate glycerol and grow poorly in the presence of high osmolarity (Hohmann *et al.* 2007). In response to osmotic stress, the Fps1 channel closes to maintain internal glycerol, but this effect seems to be independent of Hog1 (Tamás *et al.* 1999). On the other hand, direct regulation of Fps1 transport capacity and protein stability by Hog1 has been described for arsenite transport and in response to weak acid treatment (Thorsen *et al.* 2006; Mollapour and Piper 2007; Beese *et al.* 2009). In addition, the stress-induced phosphorylation of Rgc2, a novel regulator of Fps1 channel activity, is also partially controlled by the Hog1 MAPK (Mollapour and Piper 2007; Beese *et al.* 2009). The precise mechanism by which Fps1 is controlled upon osmotic stress remains unclear.

The combined data indicate that the accumulation of glycerol is a key adaptive response to high osmolarity that is modulated by several mechanisms with different kinetics and different quantitative contributions to achieve proper adaptation to osmotic stress.

### General stress responses

In addition to glycerol, a number of other organic osmolytes, including trehalose, protect yeast from osmotic stress, not only by counteracting water efflux and reestablishing osmotic balance, but also by playing unique roles in antioxidation, detoxification, and the stabilization of cellular proteins and structures (Mager and Varela 1993; Yancey 2005). Notably, a number of genes that are upregulated by osmotic stress have similar protective functions as these osmolytes (de Nadal and Posas 2010; Martínez-Montañés *et al.* 2010). For

example, in response to osmotic stress, a number of genes that protect cells from oxidative damage are upregulated, including genes involved in redox metabolism, mitochondrial function, and the biosynthesis of antioxidative compounds (e.g., *TRX2*, *CTT1*, *GRE3*, and *SOD2*). Genes that encode the chaperones (e.g., *HSP12*, *HSP104*, and *HSP42*) that protect cells from damage by protein denaturation are also upregulated. It is worth noting that *Hog1* has also been implicated in ER stress protection, which is induced in response to the accumulation of unfolded proteins (Bicknell *et al.* 2010; Torres-Quiroz *et al.* 2010; Eraso *et al.* 2011), and in the control of mitophagy, the specific autophagic elimination of mitochondria (Aoki *et al.* 2011; Mao *et al.* 2011).

One role of the transcriptional response to a specific stress is to generate a cross-protection to other types of stresses. Osmotic stress induces many genes that are considered to be part of general stress responses. Conversely, when cells are subjected to a mild stress (e.g., oxidative stress or heat stress), stress response element (STRE)-mediated responses are induced even in the absence of *Hog1* (Berry and Gasch 2008). Thus, at 37°, *hog1Δ* cells can survive on moderate osmotic stress, such as 0.8 M sorbitol, better than at 30° (Siderius *et al.* 2000). This protection is not sufficient for *hog1Δ* cells to survive higher levels of osmolarity.

### Regulation of gene expression by osmotic stress

#### Global analysis of gene expression upon osmotic stress:

Exposure of yeast to high osmolarity results in profound changes in the physiology of the cell and has a major impact on the capacity of the cell for gene expression. Analysis of the transcriptional changes mediated by *Hog1* in response to osmotic stress may lead to a general understanding of how cells rapidly, precisely, and extremely efficiently adjust the full complement of a transcriptional program in response to extracellular stimuli. Indeed, the *Hog1* MAPK plays a key role in the regulation of mRNA biogenesis by controlling several steps in the transcription process (Figure 9) (Hohmann 2002b; de Nadal and Posas 2010; Martínez-Montañés *et al.* 2010; de Nadal *et al.* 2011). Although the role of *Hog1*-dependent gene expression in osmo-adaptation is still incompletely understood, it is clear that long-term adaptation to high osmolarity requires regulated transcription, as a number of mutants in the transcriptional machinery render cells osmosensitive (de Nadal *et al.* 2004; Zapater *et al.* 2007; Mas *et al.* 2009). On the other hand, it has been shown that a membrane-tethered *Hog1* construct abolishes short-term transcription responses at certain osmolarities (so that it cannot enter the nucleus). Nevertheless, this *Hog1* construct is still able to suppress the osmosensitivity of a *hog1Δ* strain (Westfall *et al.* 2008). Therefore, cytoplasmic events caused by the rapid and transient activation of the *Hog1* MAPK in response to osmotic stress—such as the control of glycerol production by direct modulation of metabolic enzymes (Dihazi *et al.* 2004; Bouwman *et al.* 2011) and the altered mRNA stability (Molin *et al.* 2009; Romero-Santacreu *et al.* 2009; Miller *et al.* 2011)—might be suffi-

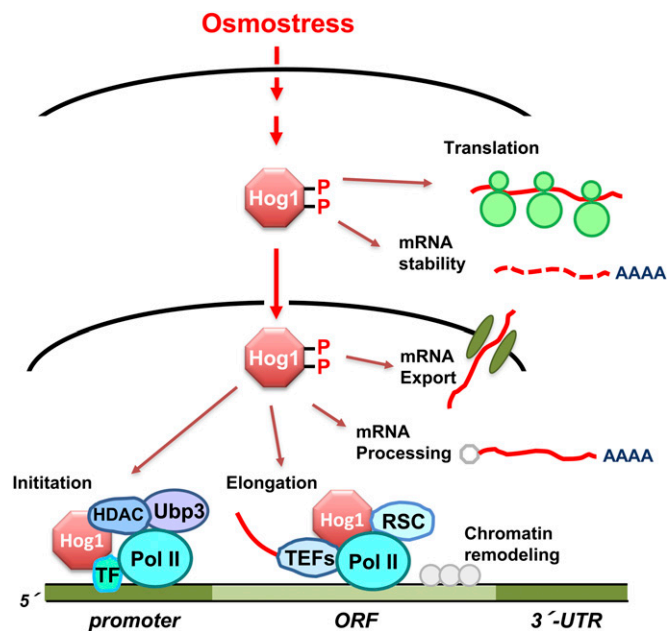

**Figure 9** Control of mRNA biogenesis by the Hog1 MAPK. Once activated upon osmotic stress, Hog1 controls many aspects of mRNA biogenesis both in the nucleus and in the cytoplasm. Hog1 phosphorylates and activates transcription factors (TFs). Remarkably, Hog1 associates to loci of stress-responsive genes to modulate both initiation and elongation. Hog1 also seems to control mRNA processing, nuclear export, translation and mRNA stability.

cient for the maintenance of osmotic balance under these experimental conditions without invoking induced gene expression in the nucleus.

Global transcriptional responses to diverse stresses in *S. cerevisiae* have been studied in detail using gene expression profiling. There are a large number of genes whose transcription is induced in response to osmotic stress; of these genes, there is one subset of genes that specifically responds to osmotic stress, whereas another subset of genes responds indiscriminately to diverse types of stresses. Induction of the latter group of genes is known as the environmental stress response (ESR). The ESR consists of ~300 to ~600 genes whose expression is upregulated or downregulated by stresses such as DNA damage, heat shock, osmotic stress, or oxidative stress (Gasch *et al.* 2000; Causton *et al.* 2001; Capaldi *et al.* 2008). The extent and kinetics of the ESR appear to be dependent on the severity of the stress, since cells exposed to increasing stress often display broader changes in gene expression. This general stress response has been implicated in the phenomenon of cross-protection, whereby exposure to a non-lethal dose of one stress can protect cells against unrelated stresses (Berry and Gasch 2008). The genes upregulated by the ESR include genes involved in carbohydrate metabolism, protein metabolism, intracellular signaling, and defense against reactive oxygen species and DNA damage. On the other hand, most of the genes downregulated by the ESR are involved in protein synthesis and in growth-related processes (Gasch 2007; Martínez-Montañés *et al.* 2010).

It has been clearly established that the stress-responsive MAPKs, such as the mammalian JNK and p38 MAPKs, have a key role in the regulation of transcription upon a diverse array of stresses. In addition to the genes commonly regulated by the ESR, other genes play specific roles in adaptation to particular stresses, and these are also, in varying degrees, under the control of stress-responsive MAPKs. In *S. cerevisiae*, in which the ESR is not governed by a single regulatory system but by different signaling pathways and transcription factors depending on the type of stress, the *Hog1* MAPK is critical for the regulation of ESR genes under osmotic stress (Posas *et al.* 2000). Indeed, studies using a *hog1* $\Delta$  mutant strain revealed that, although it depends on the severity of the stress, ~80% of the genes that are induced upon osmotic stress depend on the *Hog1* MAPK for full induction (Posas *et al.* 2000; Rep *et al.* 2000; O'Rourke and Herskowitz 2004; Capaldi *et al.* 2008).

***Hog1* controls gene expression by regulating transcription factors:** One of the well-characterized functions of the family of stress-responsive MAPKs including *Hog1* is the regulation of gene expression at the initiation step of transcription. Indeed, *Hog1* regulates several unrelated transcription factors, each of which is responsible for controlling the expression of a subset of osmo-responsive genes, either directly or in collaboration with other factors (Molin *et al.* 2009; Romero-Santacreu *et al.* 2009; Miller *et al.* 2011). These *Hog1*-regulated factors include the transcription activators *Hot1*, *Smp1*, *Msn1*, *Msn2*, and *Msn4* and the transcription repressor *Sko1* (de Nadal and Posas 2008). These factors can act independently or in combination at specific promoters to elaborate a dynamic transcriptional response to stress (Ni *et al.* 2009). A recent study that combined dynamic transcriptome analyses with an analysis of mRNA synthesis rates suggested that additional transcription factors could exist that act in association with these factors and are important for the response to osmotic stress (Molin *et al.* 2009; Romero-Santacreu *et al.* 2009; Miller *et al.* 2011). Therefore, these factors could also be substrates of *Hog1*. Overall, it is clear that a collaborative effort of many different transcription factors is needed for gene induction upon osmotic stress.

Direct phosphorylation of promoter-specific transcription factors is the best-understood mechanism by which the *Hog1* MAPK modulates initiation of transcription. Examples of regulation by direct phosphorylation have been reported for the MEF2-like activator *Smp1* and the ATF/CREB-family member *Sko1* (Nehlin *et al.* 1992; Vincent and Struhl 1992). *In vivo* coprecipitation and phosphorylation studies showed that *Smp1* and *Sko1* interact with, and are directly phosphorylated by, *Hog1* (Proft *et al.* 2001; de Nadal *et al.* 2003). Regulation of *Sko1* function has an extra layer of complexity: while *Sko1* acts as a transcription activator in the presence of stress, it acts as a transcriptional repressor in the absence of stress. In the absence of stress, *Sko1* represses stress-inducible genes by recruiting the general transcription

corepressor complex *Ssn6* (*Cyc8*)–*Tup1* to their promoters (Garcia-Gimeno and Struhl 2000; Pascual-Ahuir *et al.* 2001). Induction of *Sko1*-dependent genes requires the release of this repression, and this process is completely dependent on *Hog1* (Pascual-Ahuir *et al.* 2001; Proft and Struhl 2002). In fact, *Hog1*-dependent phosphorylation of *Sko1* changes *Sko1* from a repressor into an activator by modifying its association with the *Tup1*–*Ssn6* complex and allows the recruitment of the chromatin-remodeling complexes SAGA and SWI/SNF to osmotic stress-inducible promoters (Rep *et al.* 2001; Proft and Struhl 2002; Guha *et al.* 2007; Kobayashi *et al.* 2008). These examples illustrate that the direct phosphorylation of transcription factors by activated *Hog1* is a key regulatory element for induction of gene expression in response to osmotic stress.

***Hog1* controls gene expression by associating with chromatin:** *Hog1* also affects the functions of transcription factors by mechanisms other than by direct phosphorylation. Indeed, phosphorylation by *Hog1* may not be critical for regulation of a number of transcriptional regulators that are under *Hog1* control, such as *Msn2*, *Msn4*, and *Hot1* (Alepez *et al.* 2003). *Msn2* and *Msn4* mostly control induction of ESR genes through the STRE (Martínez-Pastor *et al.* 1996; Schmitt and McEntee 1996), and *Hot1* affects expression of a small subset of *Hog1*-dependent genes, including *GPD1* and *GPP2*, which are involved in glycerol biosynthesis, as well as *STL1*, which encodes a glycerol/proton symporter (Rep *et al.* 1999b, 2000; Ferreira *et al.* 2005).

The fact that the nuclear retention of *Hog1* upon osmotic stress is dependent on the presence of the transcription factors that are downstream of *Hog1* suggested that these factors could act as nuclear anchors for *Hog1* by engaging in stable interactions with it (Reiser *et al.* 1999; Rep *et al.* 1999b). Indeed, *Hog1* does associate with chromatin, and it does so via physical interactions with transcription factors. For example, recruitment of *Hog1* to the *CTT1* promoter requires the transcription factors *Msn2* and *Msn4*, whereas recruitment of *Hog1* to the *STL1* promoter depends on the transcription activator *Hot1* (Alepez *et al.* 2001). It is worth noting that *Hog1* binds only to osmo-responsive genes (Pascual-Ahuir *et al.* 2006; Pokholok *et al.* 2006; Proft *et al.* 2006). An accumulation of *Hog1* in the nucleus is not sufficient for its association with chromatin, since addition of a nuclear localization signal to *Hog1* does not result in its enhanced chromatin association. However, binding of *Hog1* to chromatin does depend on its catalytic activity (Alepez *et al.* 2001). Thus, in contrast to the more traditional scenario in which a MAPK controls transcription only indirectly by phosphorylating transcription factors, the persistent presence of *Hog1* at target promoters clearly indicates that *Hog1* itself plays an important role in the regulation of transcription initiation (Alepez *et al.* 2001; Chellappan 2001; Proft and Struhl 2002). Systematic genome-wide analyses of the binding of transcription factors and of *Hog1* to chromatin, combined with gene expression profiling, have



shown that, in response to osmotic stress, *Hog1* can specifically regulate, and integrate, the stress responses that occur at different promoters. This effect is accomplished by *Hog1* via modulation of the individual contribution of transcription factors, such as *Msn2/Msn4*, *Skp1*, and *Hot1*, in a promoter-specific context that results in a complex and highly specific control of transcriptional networks (Proft *et al.* 2005; Capaldi *et al.* 2008; Ni *et al.* 2009).

Other yeast MAP kinases such as *Fus3*, *Kss1*, and *Mpk1* are also recruited to chromatin (Pokholok *et al.* 2006; Kim *et al.* 2008). Furthermore, structurally and functionally unrelated yeast signaling kinases, including *Snf1* (Lo *et al.* 2005; Li *et al.* 2006; Pokholok *et al.* 2006), have been reported to be recruited to chromatin. Similar binding of signaling kinases to chromatin, implying their direct roles in gene regulation, has now been shown to occur in several other organisms including mammals and *Drosophila* (Chow and Davis 2006; Edmunds and Mahadevan 2006; de Nadal and Posas 2010; de Nadal *et al.* 2011).

#### **Transcription initiation at osmotic stress-responsive promoters:**

The observation that *Hog1* kinase activity is needed for transcriptional activation, even though phosphorylation of transcription factors is not an absolute requirement for transcription initiation, indicates that *Hog1* can induce activation of gene expression by a mechanism other than phosphorylation of transcription activators. Indeed, recruitment of the RNA Pol II machinery to osmotic stress-responsive genes is dependent on both activated *Hog1* and the presence of specific transcription factors. The facts that *Hog1* tightly associates with the largest subunit of RNA Pol II and that the artificial tethering of *Hog1* to chromatin is sufficient to induce gene expression upon osmotic stress suggest that *Hog1* serves to recruit the basic transcriptional machinery to stress-responsive promoters (Alepez *et al.* 2003).

It has been shown that the extent of transcriptional activation is regulated by the *Ubp3* ubiquitin protease. *Ubp3* is targeted to stress-responsive genes by *Hog1*, and its activity is regulated by direct phosphorylation by *Hog1*. Thus, the regulation of the turnover of specific transcription factors and/or RNA Pol III at the promoter seems to be important for the dynamics of gene expression upon stress (Solé *et al.* 2011). Furthermore, genetic and biochemical data suggests that, in addition to binding to transcriptional activators and facilitating RNA Pol II recruitment, *Hog1* is also important for the recruitment of basic transcription complexes such as SAGA, Mediator, and SWI/SNF to osmotic stress-responsive promoters. Several observations indicate that, whereas Mediator is crucial for proper gene induction under both mild and severe osmotic stress conditions, the role of SAGA is dependent on the strength of the osmotic stress. Thus, the requirement for a given transcriptional complex to regulate a promoter might depend on the severity of osmotic stress and be determined through the regulation of interactions among transcriptional complexes (Zapater *et al.* 2007). The recruitment of the SWI/SNF chromatin-

remodeling complex to promoters also depends on the presence of *Hog1*. Although elimination of components of the SWI/SNF complex does not lead to clearly observable effects on transcription, modification of chromatin might still be important for efficient transcription in response to osmotic stress (Proft and Struhl 2002).

Although histone deacetylation has been classically associated with repression of gene expression (Robyr *et al.* 2002), there are many genes for which histone deacetylation is associated with transcription induction (Bernstein *et al.* 2000; Shahbazian and Grunstein 2007). In fact, the *Rpd3* histone deacetylase (HDAC) complex plays an important role in induction of gene expression by osmotic stress. *Rpd3* belongs to a five-member family of related histone deacetylases, and it has been reported to regulate the expression of a large number of genes (Yang and Seto 2008). There are two different *Rpd3*-containing HDAC complexes, the larger *Rpd3L* and the smaller *Rpd3S*, that share a common core composed of *Rpd3*, *Sin3*, and *Ume1*. Whereas the *Rpd3L* complex is recruited to promoters to enhance transcription initiation, the *Rpd3S* complex controls promoter fidelity by suppressing spurious intragenic transcription during elongation (Carrozza *et al.* 2005; Keogh *et al.* 2005; Li *et al.* 2007b,c; Biswas *et al.* 2008). Cells defective in *Rpd3* and in other components of the *Rpd3L* complex are osmotic stress-sensitive and show compromised expression of osmotic stress-responsive genes controlled by *Hog1*. *Hog1* binds to an *Rpd3* complex (presumably *Rpd3L*) and, upon stress, recruits it to specific osmotic stress-responsive genes. Binding of the *Rpd3* complex to specific promoters leads to histone deacetylation, entry of RNA polymerase II, and induction of gene expression (de Nadal *et al.* 2004). It should be added that the role of the *Rpd3* complex at osmotic stress-responsive promoters need not be restricted to alteration of chromatin structure, but it might also provide a unique binding surface or recognition motifs for the recruitment of transcription activators.

#### **Transcription elongation of osmotic stress-responsive genes:**

Elongation is also a critical phase of transcription that is highly regulated, and modification of the RNA Pol II carboxy-terminal domain is just one example of such regulation (Saunders *et al.* 2006; Egloff and Murphy 2008; Fuda *et al.* 2009). Upon osmotic stress, the *Hog1* MAPK interacts with RNA Pol II as well as with the general components of the transcription elongation complex while these are engaged in elongation (Proft *et al.* 2006). In addition to its association with the promoter regions of osmotic stress-responsive genes, *Hog1* is also present on the coding regions of these genes, and it travels with elongating RNA Pol II (Pascual-Ahuir *et al.* 2006; Pokholok *et al.* 2006; Proft *et al.* 2006). It should be noted that the binding of *Hog1* to the coding regions is independent of promoter-bound transcription factors, but is dependent on the 3'-UTR region of osmotic stress-responsive genes. The mechanism by which *Hog1* is recruited to the 3'-regions of osmotic stress-responsive genes is unclear. By fusing a *Hog1*-independent promoter to the coding region of

a *Hog1*-dependent gene, it is possible to uncouple *Hog1*-dependent transcription initiation from transcription elongation. Thus, it has been demonstrated that the presence of *Hog1* at coding regions is essential for increased association of RNA Pol II with the coding region, suggesting that *Hog1* directly affects the process of elongation (Proft *et al.* 2006). Other yeast signaling kinases, such as *Fus3* or PKA, also associate with the coding regions of activated genes (Pokholok *et al.* 2006), which indicates that signaling kinases play a role in transcription beyond initiation.

**Remodeling of chromatin in response to osmostress:** The packaging of DNA into nucleosomes affects all phases of the transcription cycle from the binding of activators and formation of a pre-initiation complex to elongation. Thus, nucleosome positioning and dynamics is another layer of transcription regulation (Cairns 2009; Jiang and Pugh 2009). As in the case of initiation, transcription elongation is also affected by chromatin structure, which is regulated by several protein factors that covalently modify histones or temporarily remove, disassemble, and reassemble nucleosomes (Li *et al.* 2007a). Chromatin-remodeling complexes utilize the energy of ATP hydrolysis to alter histone-DNA contacts by transiently unwrapping DNA, forming DNA loops, sliding nucleosomes, completely displacing the histones from DNA, or replacing histone subunits. Transcriptional responses to stress and chromatin structure alterations are tightly linked (Shivaswamy and Iyer 2008).

In response to osmostress, the nucleosome organizations of the osmostress-responsive genes undergo a dramatic change that depends on *Hog1* and on the RSC chromatin-remodeling complex. The RSC complex (including *Rsc1*, *Rsc2*, *Rsc3*, etc.) is a distinct member of the SWI/SNF family and is known to modify nucleosome structure. Upon osmostress, the *Hog1* MAPK physically interacts with RSC to direct its association with the coding region of osmostress-responsive genes, suggesting that this activity could be a major role of *Hog1* during elongation. Notably, in RSC mutants, RNA Pol II still accumulates at the promoter regions of the osmostress-responsive genes, but not at their coding regions, implying that elongation is specifically suppressed. Furthermore, RSC mutants display reduced expression of osmostress-responsive genes and enhanced osmostress sensitivity (Mas *et al.* 2009). Cell adaptation under acute osmostress might thus depend on a burst of transcriptional activity that can occur only with efficient nucleosome eviction. Remarkably, the exposure of cells to mild osmostress results in bimodal expression of osmostress-responsive genes: expression levels among a population of equally stimulated cells are not continuously distributed, but display low and high peaks (Pelet *et al.* 2011). This bimodality arises at the transcriptional level: even if *Hog1* is activated to a similar level in all cells, the transcriptional outcome is determined by a slow stochastic transition from a repressed transcriptional state to an activated state. This transition seems to depend on chromatin structure.

In addition to the RSC complex, two other chromatin remodelers have been found to associate with stress-responsive genes; the SWI/SNF complex, which has been discussed above, and the *INO80* complex, which contains subunits such as *Ino80* and *Arp8*. Disruption of the *INO80* complex-specific gene *ARP8* results in extended expression of, and a delay in nucleosome reassembly at, stress-responsive genes during osmostress adaptation (Klopf *et al.* 2009). Therefore, chromatin-remodeling complexes and chromatin-modifying enzymes are key elements for stress-mediated gene expression, and a dynamic balance among different chromatin-remodeling complexes seems to be required for proper regulation of stress-responsive genes.

**Control of mRNA processing and stability by *Hog1*:** Eukaryotic mRNAs are synthesized as precursors by RNA Pol II and are subsequently extensively modified, spliced, cleaved at the 3'-end, and polyadenylated. In addition, nuclear export and translation of mRNAs is coordinated differentially. At present, it is unclear whether osmostress-responsive genes are post-transcriptionally regulated by specific mRNA-binding proteins and what potential role the *Hog1* MAPK might play in their regulation. In mammalian cells, stress-responsive p38 MAPK contributes to stabilization of cytokine/stress-inducible mRNAs, through an ARE (AU-rich elements present in 3'-UTR)-targeted mechanism. AREs regulate mRNA turnover by modulating poly(A)-shortening rates and the subsequent decay of mRNA. In *S. cerevisiae*, inhibition of the *Hog1* pathway by the p38 inhibitor SB202190 leads to destabilization of ARE-bearing transcripts, suggesting that a similar mechanism exists in yeast (Vasudevan and Peltz 2001). Although this is a very interesting mechanism by which *Hog1* might influence gene expression, its role in osmostress responses is unknown.

Genome-wide analyses have shown that there is a clear and specific regulation of stress-responsive mRNA in comparison with global mRNAs (Molin *et al.* 2009; Romero-Santacreu *et al.* 2009; Miller *et al.* 2011). For example, under mild osmostress, destabilization of a broad range of mRNAs is induced, whereas osmostress-inducible mRNA synthesis is upregulated and the half-life of these mRNAs is extended. In a *hog1Δ* mutant, mild osmostress induces global stabilization of mRNA and P-body formation (Romero-Santacreu *et al.* 2009). Notably, stress-responsive mRNAs are selectively stabilized or degraded, depending on the phase of the response to stress, namely, initial shock, induction, or recovery (Miller *et al.* 2011). It is clear from these reports that *Hog1* has an effect on mRNA stability, especially for osmostress upregulated genes. However, the mechanism by which *Hog1* controls the stability of mRNAs is unclear.

#### **Regulation of cell-cycle progression by osmostress**

In *S. cerevisiae*, a highly regulated and complex network of proteins governs cell-cycle progression, although major events are controlled by a single cyclin-dependent kinase (CDK) *Cdc28*. The activity of *Cdc28* is regulated mainly through the synthesis and degradation of various cyclins

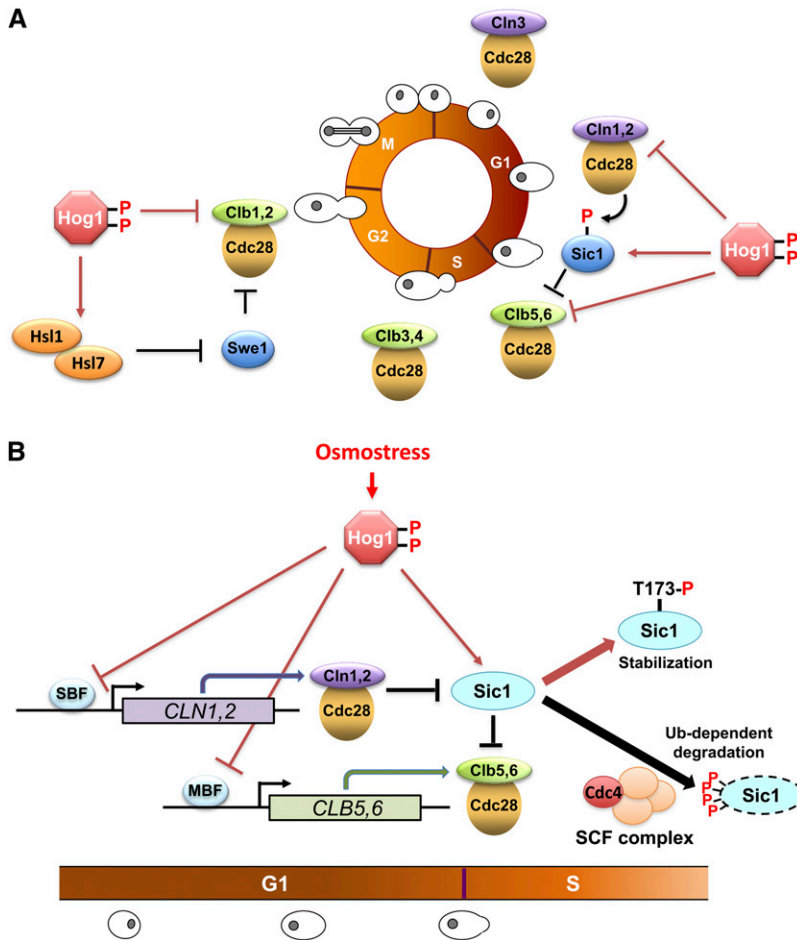

**Figure 10** Control of the cell-cycle progression by the Hog1 MAPK. (A) The dominant species of the cyclin/Cdc28 complex at each cell-cycle phase are shown around the circle that represents the cell cycle ( $G_1 \rightarrow S \rightarrow G_2 \rightarrow M$ ). Once activated by osmostress, Hog1 seems to modulate all phases of the cell cycle. In the  $G_1$  and  $G_2$  phases, Hog1 controls cell-cycle regulators both directly and indirectly, and Hog1 also regulates expression of cyclins. Hog1 also modulates the S and M phases, but the mechanisms remain unclear (not shown). (B) Details of the control of the  $G_1/S$  transition by Hog1. The transition from  $G_1$  to S phase is mediated by the expression of cyclins Cln1,2 and Clb5,6, and their binding to the Cdc28 kinase. Initially, Clb5,6/Cdc28 is inhibited by the Sic1 (CDKi). As the activity of Cln1,2/Cdc28 increases, Sic1 is phosphorylated at multiple sites, prompting ubiquitination of Sic1 by the SCF (Cdc4) complex, and its degradation by proteasome. This degradation of Sic1 releases active Clb5,6/Cdc28, which then promotes DNA replication. Osmostress-activated Hog1 delays  $G_1/S$  transition both by inhibiting transcription of cyclin genes (both *CLN* and *CLB*), and by directly phosphorylating Sic1 at Thr-173, which inhibits ubiquitination of Sic1 and stabilizes Sic1.

and inhibitors that bind to Cdc28 (Clotet and Posas 2007). As the presence of various stresses such as heat stress, DNA damage, and extracellular hyperosmolarity critically affects cell cycle progression through the cell cycle, cells must modulate the cell cycle to allow for proper cellular adaptation (Flattery-O'Brien and Dawes 1998; Li and Cai 1999; Wang *et al.* 2000; Alexander *et al.* 2001). For cells under these stress conditions, controlled delay of cell-cycle progression is very important, since it enables cells to adapt to the new environmental conditions before moving through vulnerable cell-cycle transition periods.

As environmental stresses can occur at any cell-cycle stage, in principle, all phases of the cell cycle must be regulated by stress-activated mechanisms. In mammals, the p38 stress-responsive MAPK has been implicated in regulating  $G_1$  phase, S phase, as well as a  $G_2/M$  checkpoint, in response to several stimuli, including osmostress (Dmitrieva *et al.* 2002; Joaquin *et al.* 2012). In yeast, the Hog1 MAPK induces a rapid and transient delay at various stages of the cell cycle to permit the full development of adaptive responses before cell-cycle progression resumes (Figure 10A) (Clotet and Posas 2007; Yaakov *et al.* 2009).

**$G_1/S$  transition:** In yeast, the  $G_1/S$  transition is controlled by the interplay of several cyclins. At the beginning of  $G_1$ ,

the Cln3 cyclin is sequestered in the cytoplasm by the Whi3 retention factor (Bellí *et al.* 2001; Garí *et al.* 2001). In the late  $G_1$  phase, nuclear accumulation of Cln3 triggers the phosphorylation of the transcription repressor Whi5 by Cln3-bound Cdc28 (Cln3/Cdc28) (Costanzo *et al.* 2004; de Bruin *et al.* 2004). Phosphorylated Whi5 dissociates from the transcription complexes SBF and MBF, which leads to the transcription of a second wave of cyclins (Cln1, Cln2, Clb5, and Clb6). The  $G_1$  cyclins Cln1 and Cln2 are functionally redundant and are abbreviated as Cln1,2; similarly, the B-type cyclins Clb5 and Clb6 are redundant and are abbreviated as Clb5,6. The activity of Cln1,2/Cdc28 stimulates bud formation and phosphorylation of the CDK inhibitor Sic1 (Figure 10B). Unphosphorylated Sic1 binds and inhibits Clb5,6/Cdc28. When several residues in Sic1 are phosphorylated by Cln1,2/Cdc28, Sic1 is poly-ubiquitinated and degraded by the proteasome (Verma *et al.* 1997). Sic1 degradation removed Sic1 inhibition of Clb5,6/Cdc28. Activated Clb5,6/Cdc28 can phosphorylate Sic1 at the same residues as those phosphorylated by Cln1,2/Cdc28. Thus, Sic1 degradation accelerates by the positive feedback loop, resulting in an abrupt rise in Clb5,6/Cdc28 activity, which drives cells into S phase. DNA replication is initiated when Clb5,6/Cdc28 phosphorylates the replication proteins Sld2 and Sld3, which are components of the pre-initiation

complex (Masumoto *et al.* 2002; Tanaka *et al.* 2007). Therefore, at the end of  $G_1$ , the activity of *Clb5,6/Cdc28* depends on both the levels of the *Clb5,6* cyclins and the levels of the inhibitor *Sic1* (Schwob *et al.* 1994; Verma *et al.* 1997; Cross *et al.* 2007).

When yeast cells are exposed to high osmolarity (e.g., 0.4 M NaCl), the *Hog1* MAPK is transiently activated for ~30 min, and a corresponding cell-cycle delay in  $G_1$  is observed (Bellí *et al.* 2001). That this delay is caused by activated *Hog1*, and not by other effects of osmolarity, can be demonstrated using genetic means to activate *Hog1* in the absence of osmolarity. Experimentally, this can be achieved by high-temperature inactivation of an *sln1-ts* mutant or expression of the constitutive *PBS2<sup>DD</sup>* allele, both of which are upstream of the *Hog1* activation pathway. If *Hog1* activity is sustained for an extended period, cells undergo a programmed cell death that requires the action of the nuclear serine proteinase *Nma111* and the SCF<sup>*CDC4*</sup> ubiquitin ligase (Vendrell *et al.* 2011). However, a shorter activation of the HOG pathway results in cell-cycle delay in  $G_1$ . *Hog1* controls the  $G_1/S$  transition by acting on two different components of the basic cell-cycle machinery (Escoté *et al.* 2004; Clotet and Posas 2007; Zapater *et al.* 2007; Adrover *et al.* 2011). First, *Hog1*-mediated  $G_1$  arrest is partially mediated by downregulation of expression of the  $G_1$  cyclins *Cln1,2* and of the S-cyclin *Clb5* (Bellí *et al.* 2001). The exact nature of the mechanism that delays the expression of these SBF/MBF-dependent genes under osmotic stress remains unknown. Second, *Hog1* promotes a cell-cycle delay in  $G_1$  by direct phosphorylation of *Sic1* at a specific residue (Escoté *et al.* 2004). When *Cln1,2/Cdc28* activities reach a threshold level, *Sic1* is phosphorylated, then ubiquitinated by the *Cdc4* ubiquitin ligase, and eventually degraded by the proteasome. If *Hog1* is activated by osmolarity, it interacts physically with *Sic1* and phosphorylates another residue (Thr-173) at the carboxyl terminus of *Sic1*. This phosphorylation inhibits *Sic1* ubiquitination (Escoté *et al.* 2004; Zapater *et al.* 2005). Thus, *Sic1* degradation is inhibited, resulting in prolonged inhibition of *Clb5,6/Cdc28* and a delay in the  $G_1/S$  transition. Incidentally, it should be noted that the same Thr-173 in *Sic1* is targeted by the TOR pathway to delay cell-cycle progression in  $G_1$  (Zinzalla *et al.* 2007).

Mathematical modeling and quantitative *in vivo* experiments have defined the differential roles of *Hog1* in  $G_1$  delay (Adrover *et al.* 2011). There are distinct effects of *Hog1* at different cell-cycle stages in response to osmolarity: early in  $G_1$ , it inhibits cyclin expression, and later in  $G_1$ , it inhibits *Sic1* degradation. Of the three cyclin genes whose transcription is inhibited by *Hog1*, inhibition of *CLN1,2* expression delays bud morphogenesis, and inhibition of *CLB5* expression delays DNA replication and entry into S phase. Later in  $G_1$ , when these cyclins are already expressed, inhibition of cyclin expression can no longer prevent cell-cycle progression. Instead, *Hog1*-mediated phosphorylation and inhibition of the degradation of *Sic1* prevents active *Clb5/Cdc28*

from initiating DNA replication. Thus, these two distinct mechanisms that operate at different time points ensure that no premature entry into S phase occurs under osmolarity conditions.

**S phase:** The *Hog1* MAPK is also able to modulate S-phase progression in response to osmolarity. During S phase, replication of the genome occurs, which is a highly ordered process involving many proteins. The assembly of the replication complex (RC) at origins of replication begins with the formation of the pre-replicative complex (pre-RC) during late mitosis to  $G_1$ . In the S phase, the pre-RC is converted into a fully assembled pre-initiation complex. Further conversion to a fully functional RC is accompanied by various molecular events, including phosphorylation of the *Dpb2* subunit of the DNA polymerase by CDK. These processes are dependent on the activities of S-phase CDK (*Clb5,6/Cdc28*) and *Dbf4*-dependent kinase (the *Cdc7/Dbf4* complex). When cells are stressed in early S phase, *Hog1* controls the S phase by delaying the expression of the S-phase cyclins *Clb5,6* (see *G<sub>1</sub>/S transition*). If cells are stressed later in S phase, *Hog1* interacts with components of the replication complex and delays phosphorylation of the *Dpb2* subunit of the DNA polymerase (Yaakov *et al.* 2009). These effects of *Hog1* are independent of the S-phase DNA checkpoint or of the known *Hog1* targets *Sic1* and *Swe1*.

One possible reason to delay the cell cycle when osmolarity occurs in the S phase is the need to prevent replication from interfering with the necessary transcription of adaptive genes. Adaptive responses to osmolarity require that expression of a very large number of genes is induced. It is therefore conceivable that initiating or ongoing replication might occur on the genes that are being transcribed for adaptation. It is easy to see that if the large replication complex and the transcription complex attempt to occupy the same space, they would interfere with each other's function. Furthermore, it has been shown that a collision between RNA Pol II and DNA polymerase leads to transcription-associated recombination (Aguilera 2002, 2005; Aguilera and Gómez-González 2008). Thus, delaying replication in response to osmolarity must be important both to provide proper adaptive gene expression and to prevent genomic instability.

**G<sub>2</sub> phase:** Cell-cycle progression from the S into the  $G_2$  phase depends mainly on another wave of cyclin production: the mitotic cyclins *Clb1* and *Clb2*. The *Mcm1/SFF* (*Mcm1/Fkh2/Ndd1*) complex is the transcription factor that regulates expression of *CLB1* and *CLB2* (Althoefer *et al.* 1995; Maher *et al.* 1995; Jorgensen and Tyers 2000). Further cell-cycle progression from  $G_2$  into mitosis is controlled by the morphogenetic checkpoint. The  $G_2/M$  transition depends on the activity of CDK that is associated with either of these mitotic cyclins (*Clb1,2/Cdc28*). The activity of the *Clb2/Cdc28* complex is inhibited by phosphorylation at a conserved tyrosine in *Cdc28* by the kinase *Swe1* (the ortholog of *Schizosaccharomyces pombe* and mammalian

Wee1) and is reactivated by the phosphatase Mih1 (the ortholog of *S. pombe* and mammalian Cdc25). When the formation of the septin ring is completed on the neck between mother and daughter cells, the morphogenetic checkpoint recruits a complex of Hsl1 (a septin-dependent protein kinase) and Hsl7 (a protein that binds to Swe1) to Swe1, which targets Swe1 for destruction. Swe1 does not affect cell-cycle progression under unstressed, exponentially growing conditions (Amon *et al.* 1992). However, when bud formation is impaired by various stresses, Swe1 remains active, inactivates the mitotic CDK, and delays the cell cycle (McMillan *et al.* 1999). Perturbations of the actin cytoskeleton, rather than the bud size itself, seem to stabilize Swe1 (McNulty and Lew 2005).

Activation of Hog1 upon osmostress induces a cell-cycle delay in G<sub>2</sub> by decreasing Clb2/Cdc28 activity and by downregulating CLB2 transcription (Alexander *et al.* 2001; Clotet *et al.* 2006). The mechanisms that Hog1 uses to downregulate CLB2 transcription are not known, but this downregulation could be a secondary effect due to the Hog1-induced decrease in Clb2/Cdc28 activity. In contrast, the mechanism by which Hog1 decreases Clb2/Cdc28 activity is clearly a result of Hog1 acting on the machinery of the morphogenetic checkpoint that controls Swe1 levels. Thus, activated Hog1 interacts with and directly phosphorylates Hsl1 at a residue within the Hsl7-docking site. This Hsl1 phosphorylation promotes the delocalization of Hsl7 from the neck, resulting in Swe1 accumulation and G<sub>2</sub> arrest (Clotet *et al.* 2006). In mutant cells that contain a nonphosphorylatable Hsl1, Hog1 activity cannot promote Hsl7 delocalization, fails to accumulate Swe1, and fails to arrest at G<sub>2</sub>. This explains why the mitogenic checkpoint is sensitive to osmotic stress.

**Exit from mitosis:** Exit from mitosis after chromosome segregation is controlled by a signaling cascade termed the Mitotic Exit Network (MEN). Activation of MEN is initiated by the activation of Tem1, a G-protein that is located in the spindle pole body (Morgan 1999). When cells undergo anaphase, the spindle pole body enters into the daughter cell where the GEF for Tem1, Lte1, is localized (Pereira *et al.* 2000). Activated (GTP-bound) Tem1 then binds to and activates the Cdc15 kinase, a critical component of MEN, which leads to activation of the phosphatase Cdc14. The Cdc14 protein phosphatase is tightly regulated by a competitive inhibitor Net1, which holds Cdc14 in an inactive state in the nucleolus during most of the cell cycle except during anaphase and telophase. Cdc14 is released by MEN or by the FEAR (Cdc Fourteen Early Anaphase Release) network, and spreads throughout the nucleus and cytoplasm to induce exit from mitosis. Cdc14 activates the Anaphase Promoting Complex (APC)/Cdh1, which promotes ubiquitination and degradation of the remaining B-type cyclins. Cdc14 also directly dephosphorylates CDK substrates; for example, Cdc14 dephosphorylates and stabilizes Sic1 (Stegmeier and Amon 2004).

Exit from mitosis could also be regulated by the Hog1 MAPK under osmotic stress. In response to osmostress, MEN

mutants exit from mitosis in a manner that is dependent on Hog1. In such MEN mutants, the HOG pathway seems to drive exit from mitosis by promoting the function of FEAR network that activates Cdc14, although the exact mechanism remains unclear (Reiser *et al.* 2006).

#### **Other downstream effectors of the Hog1 MAPK**

In addition to phosphorylating components of the transcriptional and cell-cycle machineries, the Hog1 MAPK also phosphorylates other cytoplasmic and nuclear proteins. Recent phospho-proteomic studies identified a number of proteins that are phosphorylated upon osmostress (Soufi *et al.* 2009). In addition, cells with mutations in kinases and phosphatases that play a role in the HOG pathway showed changes in the phospho-proteome of the cell even under normal osmotic conditions (Bodenmiller *et al.* 2010). These analyses suggest that a large number of Hog1 substrate proteins must exist that have not been previously characterized. Below, we will discuss several well-defined substrates of Hog1 that are known to have important roles in osmo-adaptation.

**Ion channels:** Activation of Hog1 in response to osmostress induces the phosphorylation of at least two proteins located at the plasma membrane, the Nha1 Na<sup>+</sup>/H<sup>+</sup> antiport and the Tok1 potassium channel (Proft and Struhl 2004). Immediately following the start of osmostress, passive water efflux rapidly increases intracellular Na<sup>+</sup> concentration, which causes dissociation of proteins from chromatin. Activated Hog1 phosphorylates and thus stimulates Nha1 activity, leading to rapid pumping-out of excessive Na<sup>+</sup>. This activity is crucial for the rapid and selective re-association of stress-responsive transcription factors with chromatin. Phosphorylation of the Tok1 K<sup>+</sup> channel also increases its activity, although its contribution to adaptation seems to be less important than that of Nha1. These initial responses to osmostress precede, and prepare for, the activation of stress-response genes that depend on Hog1.

Control of ionic fluxes during long-term adaptation occurs through regulation of the expression of the Na ATPase ENA1. Thus, a single MAP kinase coordinates diverse responses to stress that are temporally, spatially and mechanistically distinct, thereby providing very rapid initial relief, which facilitates subsequent changes in gene expression that permit long-term adaptation to harsh environmental conditions.

**Protein kinases regulated by Hog1:** There is a transient decrease in protein synthesis in response to increases in external osmolarity that is caused by a decrease in amino acid uptake, repression of ribosomal protein gene expression, and a decrease in translation efficiency (Norbeck and Blomberg 1998; Uesono and Toh-E 2002). The Hog1 MAPK is not involved in the initial inhibition of translation, but rather in the reactivation of translation under stress, which functions as an adaptation mechanism (Uesono and Toh-E 2002). The cytoplasmic Rck2 kinase, which is structurally

homologous to mammalian CaM kinases, is directly phosphorylated and regulated by *Hog1* (Bilsland-Marchesan *et al.* 2000; Teige *et al.* 2001). Reduction of protein synthesis upon osmostress was similar in *hog1* $\Delta$  and *rck2* $\Delta$  cells, which suggests that the effect of *Hog1* on translation is mediated by the *Rck2* kinase. *Rck2* may affect translation by directly regulating the elongation factor EF-2, but an effect on initiation factors cannot be excluded (Teige *et al.* 2001). An analysis of polysome-associated mRNAs showed that many genes that are not transcriptionally induced are translated more efficiently under osmostress conditions. A similar analysis of *hog1* $\Delta$  cells showed that the effect of *Hog1* on translation was even stronger than the effect on transcription, which highlights the importance of translational control for the fine tuning of adaptive responses (Warringer *et al.* 2010).

## Perspectives

In the second edition of “the Yeast Books” published in mid-1990s, there was only a very brief mention of budding yeast osmoregulation, which occupied no more than half a page (MacNeill and Nurse 1997). The relevant knowledge accumulated in the intervening 15 years, which we have tried to summarize in this review, is nothing less than astounding. Perhaps as a result, many important new questions have become apparent. Below, we have made a somewhat subjective list of questions that are particularly important. Considering the rapid progress made in the past 15 years, we can optimistically expect that many of these questions will be answered by the next edition of the YeastBook.

We now have a clear outline of the upstream signaling in osmostress pathway. However, under closer inspection, many unsolved questions remain. For example, the mechanism by which the *Sln1* osmosensor detects changes in osmolarity is unclear. Because the *Sln1* histidine kinase is structurally similar to the bacterial osmosensor EnvZ (Tokishita and Mizuno 1994; Yoshida *et al.* 2007; Wang *et al.* 2012), it is reasonable to expect that their activation mechanisms are also related. Therefore, a parallel investigation of these two osmosensors, emphasizing both their similarities and differences, might be productive. Another important question is how the *Sln1*-*Ypd1*-*Ssk1* phosphorelay is regulated, and, in particular, the mechanism by which the stability of *Ssk1* $\sim$ P changes so drastically upon osmostress stimulation.

Although mammals do not have any homolog of the *Sln1* osmosensor, they do have mucin-like transmembrane proteins that are structurally similar to the *Msb2*/*Hkr1* osmosensors. Therefore, elucidation of the mechanism by which *Msb2*/*Hkr1* detect osmolarity changes might shed light on the osmosensing mechanism in higher eukaryotes. Furthermore, it needs to be examined whether the *Msb2*/*Hkr1* osmosensors actually regulate the activity of *Cdc42*, as currently hypothesized. The function of *Sho1* in signaling should

also be further delineated. Traditionally, this molecule is considered to be a passive membrane anchor for the *Pbs2* MAPKK. However, genetic evidence suggests that *Sho1* might have a more active role in signaling, perhaps by serving as a platform around which a signaling complex is organized.

The mechanism that controls the crosstalk among the MAPK signaling pathways is another open question. For example, how activation of the *Kss1* MAPK by osmostress is prevented in wild-type cells, while this inhibition is abrogated in *hog1* $\Delta$  mutant cells, has been intensely investigated but without any clear answer. Eventually, understanding the global signaling network including the HOG signaling pathways and other intracellular signaling pathways should be an important goal in the next decade.

Regarding downstream effector functions, the number of unsolved questions is commensurate with the breadth of *Hog1* functions. There is evidence to suggest that activated *Hog1* elicits the production/accumulation of protective osmolytes through transcriptional induction of metabolic enzymes as well as by direct modulation of metabolic flux. Thus, establishment of how *Hog1* regulates the metabolic network, both at the transcriptional and posttranscriptional levels, is important for understanding of the basic logic of the cellular response to environmental osmostress. At the metabolic level, it is essential to identify the key enzymes whose activities are directly controlled by *Hog1*. We must also elucidate the still unclear details of the regulation by osmostress of transcription initiation and elongation, mRNA processing, mRNA stability, nuclear export, and translation.

Osmostress induces cell-cycle delays, which permit cells to adapt to the stress before progressing into vulnerable cell-cycle transitions. *Hog1* uses several molecular strategies, alone or in combination, to arrest cells at safer phases in the cell cycle until an osmotic balance is re-established. Some of these mechanisms have become clearer in recent years, but others remain obscure. Because of the advanced knowledge available regarding basic cell-cycle regulation, a model-based simulation will be particularly helpful in investigation of the modulation of the cell cycle by osmostress.

Finally, the search for *Hog1* substrates is far from complete. Identification and characterization of novel *Hog1* targets will serve to define new *Hog1* functions as well as the regulatory mechanisms under its control.

## Acknowledgments

We thank Pauline O’Grady and Kazuo Tatebayashi for critical reading of the manuscript. The laboratory of H.S. is supported by Grants-in-Aid for Scientific Research from the Ministry of Education, Culture, Sports, Science and Technology of Japan. The laboratory of F.P. is supported by grants from the Ministerio de Economía y Competitividad (Spanish Government), the Consolider Ingenio 2010 Programme, and a FP7 UNICELLSYS grant. F.P. is also supported by the Fundación Marcelino Botín and by the Acadèmia program from

## Literature Cited

- Adrover, M., Z. Zi, A. Duch, J. Schaber, A. González-Novo *et al.*, 2011 Time-dependent quantitative multicomponent control of the G<sub>1</sub>-S network by the stress-activated protein kinase Hog1 upon osmostress. *Sci. Signal.* 4: ra63.
- Aguilera, A., 2002 The connection between transcription and genomic instability. *EMBO J.* 21: 195–201.
- Aguilera, A., 2005 mRNA processing and genomic instability. *Nat. Struct. Mol. Biol.* 12: 737–738.
- Aguilera, A., and B. Gómez-González, 2008 Genome instability: a mechanistic view of its causes and consequences. *Nat. Rev. Genet.* 9: 204–217.
- Albertyn, J., S. Hohmann, J. M. Thevelein, and B. A. Prior, 1994 *GPD1*, which encodes glycerol-3-phosphate dehydrogenase, is essential for growth under osmotic stress in *Saccharomyces cerevisiae*, and its expression is regulated by the high-osmolarity glycerol response pathway. *Mol. Cell. Biol.* 14: 4135–4144.
- Alepuz, P. M., A. Jovanovic, V. Reiser, and G. Ammerer, 2001 Stress-induced map kinase Hog1 is part of transcription activation complexes. *Mol. Cell* 7: 767–777.
- Alepuz, P. M., E. de Nadal, M. Zapater, G. Ammerer, and F. Posas, 2003 Osmostress-induced transcription by Hot1 depends on a Hog1-mediated recruitment of the RNA Pol II. *EMBO J.* 22: 2433–2442.
- Alexander, M. R., M. Tyers, M. Perret, B. M. Craig, K. S. Fang *et al.*, 2001 Regulation of cell cycle progression by Swe1p and Hog1p following hypertonic stress. *Mol. Biol. Cell* 12: 53–62.
- Althoefer, H., A. Schleiffer, K. Wassmann, A. Nordheim, and G. Ammerer, 1995 Mcm1 is required to coordinate G2-specific transcription in *Saccharomyces cerevisiae*. *Mol. Cell. Biol.* 15: 5917–5928.
- Amon, A., U. Surana, I. Muroff, and K. Nasmyth, 1992 Regulation of p34<sup>CDC28</sup> tyrosine phosphorylation is not required for entry into mitosis in *S. cerevisiae*. *Nature* 355: 368–371.
- Aoki, Y., T. Kanki, Y. Hirota, Y. Kurihara, T. Saigusa *et al.*, 2011 Phosphorylation of serine 114 on Atg32 mediates mitophagy. *Mol. Biol. Cell* 22: 3206–3217.
- Ash, J., C. Wu, R. Larocque, M. Jamal, W. Stevens *et al.*, 2003 Genetic analysis of the interface between Cdc42p and the CRIB domain of Ste20p in *Saccharomyces cerevisiae*. *Genetics* 163: 9–20.
- Ault, A. D., J. S. Fassler, and R. J. Deschenes, 2002 Altered phosphotransfer in an activated mutant of the *Saccharomyces cerevisiae* two-component osmosensor Sln1p. *Eukaryot. Cell* 1: 174–180.
- Bardwell, L., 2006 Mechanisms of MAPK signalling specificity. *Biochem. Soc. Trans.* 34: 837–841.
- Beese, S. E., T. Negishi, and D. E. Levin, 2009 Identification of positive regulators of the yeast Fps1 glycerol channel. *PLoS Genet.* 5: e1000738.
- Bell, M., and D. Engelberg, 2003 Phosphorylation of Tyr-174 of the yeast MAPK Hog1/p38 is not vital for Hog1 biological activity. *J. Biol. Chem.* 278: 14603–14606.
- Bell, M., R. Capone, I. Pashtan, A. Levitzki, and D. Engelberg, 2001 Isolation of hyperactive mutants of the MAPK p38/Hog1 that are independent of MAPK kinase activation. *J. Biol. Chem.* 276: 25351–25358.
- Bellí, G., E. Gari, M. Aldea, and E. Herrero, 2001 Osmotic stress causes a G1 cell cycle delay and downregulation of Cln3/Cdc28 activity in *Saccharomyces cerevisiae*. *Mol. Microbiol.* 39: 1022–1035.
- Bender, A., and J. R. Pringle, 1989 Multicopy suppression of the *cdc24* budding defect in yeast by *CDC42* and three newly identified genes including the *ras*-related gene *RSR1*. *Proc. Natl. Acad. Sci. USA* 86: 9976–9980.
- Bernstein, B. E., J. K. Tong, and S. L. Schreiber, 2000 Genomewide studies of histone deacetylase function in yeast. *Proc. Natl. Acad. Sci. USA* 97: 13708–13713.
- Berry, D. B., and A. P. Gasch, 2008 Stress-activated genomic expression changes serve a preparative role for impending stress in yeast. *Mol. Biol. Cell* 19: 4580–4587.
- Bettinger, B. T., M. G. Clark, and D. C. Amberg, 2007 Requirement for the polarisome and formin function in Ssk2p-mediated actin recovery from osmotic stress in *Saccharomyces cerevisiae*. *Genetics* 175: 1637–1648.
- Bhattacharjya, S., P. Xu, R. Gingras, R. Shaykhtudinov, C. Wu *et al.*, 2004 Solution structure of the dimeric SAM domain of MAPKKK Ste11 and its interaction with the adaptor protein Ste50 from the budding yeast: implication for Ste11 activation and signal transmission through the Ste50-Ste11 complex. *J. Mol. Biol.* 344: 1071–1087.
- Bicknell, A. A., J. Tourtellotte, and M. Niwa, 2010 Late phase of the endoplasmic reticulum stress response pathway is regulated by Hog1 MAP kinase. *J. Biol. Chem.* 285: 17545–17555.
- Bilsland-Marchesan, E., J. Ariño, H. Saito, P. Sunnerhagen, and F. Posas, 2000 Rck2 kinase is a substrate for the osmotic stress-activated mitogen-activated protein kinase Hog1. *Mol. Cell. Biol.* 20: 3887–3895.
- Biswas, D., S. Takahata, and D. J. Stillman, 2008 Different genetic functions for the Rpd3(L) and Rpd3(S) complexes suggest competition between NuA4 and Rpd3(S). *Mol. Cell. Biol.* 28: 4445–4458.
- Blomberg, A., and L. Adler, 1989 Roles of glycerol and glycerol-3-phosphate dehydrogenase (NAD<sup>+</sup>) in acquired osmotolerance of *Saccharomyces cerevisiae*. *J. Bacteriol.* 171: 1087–1092.
- Bodenmiller, B., S. Wanka, C. Kraft, J. Urban, D. Campbell *et al.*, 2010 Phosphoproteomic analysis reveals interconnected system-wide responses to perturbations of kinases and phosphatases in yeast. *Sci. Signal.* 3: rs4.
- Boguslawski, G., 1992 *PBS2*, a yeast gene encoding a putative protein kinase, interacts with the *RAS2* pathway and affects osmotic sensitivity of *Saccharomyces cerevisiae*. *J. Gen. Microbiol.* 138: 2425–2432.
- Bokoch, G. M., 2003 Biology of the p21-activated kinases. *Annu. Rev. Biochem.* 72: 743–781.
- Bouwman, J., J. Kiewiet, A. Lindenbergh, K. van Eunen, M. S. Iderius *et al.*, 2011 Metabolic regulation rather than *de novo* enzyme synthesis dominates the osmo-adaptation of yeast. *Yeast* 28: 43–53.
- Brewster, J. L., and M. C. Gustin, 1994 Positioning of cell growth and division after osmotic stress requires a MAP kinase pathway. *Yeast* 10: 425–439.
- Brewster, J. L., T. de Valoir, N. D. Dwyer, E. Winter, and M. C. Gustin, 1993 An osmosensing signal transduction pathway in yeast. *Science* 259: 1760–1763.
- Brown, J. L., H. Bussey, and R. C. Stewart, 1994 Yeast Skn7p functions in a eukaryotic two-component regulatory pathway. *EMBO J.* 13: 5186–5194.
- Cairns, B. R., 2009 The logic of chromatin architecture and remodelling at promoters. *Nature* 461: 193–198.
- Capaldi, A. P., T. Kaplan, Y. Liu, N. Habib, A. Regev *et al.*, 2008 Structure and function of a transcriptional network activated by the MAPK Hog1. *Nat. Genet.* 40: 1300–1306.
- Carrozza, M. J., B. Li, L. Florens, T. Sukanuma, S. K. Swanson *et al.*, 2005 Histone H3 methylation by Set2 directs deacetylation of coding regions by Rpd3S to suppress spurious intragenic transcription. *Cell* 123: 581–592.

- Casino, P., V. Rubio, and A. Marina, 2010 The mechanism of signal transduction by two-component systems. *Curr. Opin. Struct. Biol.* 20: 763–771.
- Causton, H. C., B. Ren, S. S. Koh, C. T. Harbison, E. Kanin *et al.*, 2001 Remodeling of yeast genome expression in response to environmental changes. *Mol. Biol. Cell* 12: 323–337.
- Chellappan, S. P., 2001 HOG on the promoter: regulation of the osmotic stress response. *Sci. STKE* 93: pe1.
- Chen, R. E., and J. Thorner, 2007 Function and regulation in MAPK signaling pathways: lessons learned from the yeast *Saccharomyces cerevisiae*. *Biochim. Biophys. Acta* 1773: 1311–1340.
- Chen, Z., T. B. Gibson, F. Robinson, L. Silvestro, G. Pearson *et al.*, 2001 MAP kinases. *Chem. Rev.* 101: 2449–2476.
- Chow, C. W., and R. J. Davis, 2006 Proteins kinases: Chromatin-associated enzymes? *Cell* 127: 887–890.
- Chowdhury, S., K. W. Smith, and M. C. Gustin, 1992 Osmotic stress and the yeast cytoskeleton: phenotype-specific suppression of an actin mutation. *J. Cell Biol.* 118: 561–571.
- Clotet, J., and F. Posas, 2007 Control of cell cycle in response to osmotic stress: lessons from yeast. *Methods Enzymol.* 428: 63–76.
- Clotet, J., X. Escoté, M. A. Adrover, G. Yaakov, E. Garí *et al.*, 2006 Phosphorylation of Hsl1 by Hog1 leads to a G2 arrest essential for cell survival at high osmolarity. *EMBO J.* 25: 2338–2346.
- Costanzo, M., J. L. Nishikawa, X. Tang, J. S. Millman, O. Schub *et al.*, 2004 CDK activity antagonizes Whi5, an inhibitor of G1/S transcription in yeast. *Cell* 117: 899–913.
- Cross, F. R., L. Schroeder, and J. M. Bean, 2007 Phosphorylation of the Sic1 inhibitor of B-type cyclins in *Saccharomyces cerevisiae* is not essential but contributes to cell cycle robustness. *Genetics* 176: 1541–1555.
- Cullen, P. J., J. Schultz, J. Horecka, B. J. Stevenson, Y. Jigami *et al.*, 2000 Defects in protein glycosylation cause *SHO1*-dependent activation of a *STE12* signaling pathway in yeast. *Genetics* 155: 1005–1018.
- Cullen, P. J., W. Sabbagh Jr., E. Graham, M. M. Irick, E. K. van Olden *et al.*, 2004 A signaling mucin at the head of the Cdc42- and MAPK-dependent filamentous growth pathway in yeast. *Genes Dev.* 18: 1695–1708.
- Cvrcková, F., C. De Virgilio, E. Manser, J. R. Pringle, and K. Nasmyth, 1995 Ste20-like protein kinases are required for normal localization of cell growth and for cytokinesis in budding yeast. *Genes Dev.* 9: 1817–1830.
- Dard, N., and M. Peter, 2006 Scaffold proteins in MAP kinase signaling: more than simple passive activating platforms. *Bioessays* 28: 146–156.
- de Bruin, R. A. M., W. H. McDonald, T. I. Kalashnikova, J. Yates III, and C. Wittenberg, 2004 Cln3 activates G1-specific transcription via phosphorylation of the SBF bound repressor Whi5. *Cell* 117: 887–898.
- de Nadal, E., and F. Posas, 2008 Regulation of gene expression in response to osmotic stress by the yeast stress-activated protein kinase Hog1, pp. 81–97 in *Topics in Current Genetics*, Vol. 20, *Stress-Activated Protein Kinases*, edited by F. Posas and A. R. Nebreda. Springer-Verlag, Berlin.
- de Nadal, E., and F. Posas, 2010 Multilayered control of gene expression by stress-activated protein kinases. *EMBO J.* 29: 4–13.
- de Nadal, E., L. Casadomé, and F. Posas, 2003 Targeting the MEF2-like transcription factor Smp1 by the stress-activated Hog1 mitogen-activated protein kinase. *Mol. Cell Biol.* 23: 229–237.
- de Nadal, E., M. Zapater, P. M. Alepuz, L. Sumoy, G. Mas *et al.*, 2004 The MAPK Hog1 recruits Rpd3 histone deacetylase to activate osmo-responsive genes. *Nature* 427: 370–374.
- de Nadal, E., G. Ammerer, and F. Posas, 2011 Controlling gene expression in response to stress. *Nat. Rev. Genet.* 12: 833–845.
- Dihazi, H., R. Kessler, and K. Eschrich, 2004 High osmolarity glycerol (HOG) pathway-induced phosphorylation and activation of 6-phosphofructo-2-kinase are essential for glycerol accumulation and yeast cell proliferation under hyperosmotic stress. *J. Biol. Chem.* 279: 23961–23968.
- Dmitrieva, N. I., D. V. Bulavin, A. J. Fornace, and M. B. Burg, 2002 Rapid activation of G2/M checkpoint after hypertonic stress in renal inner medullary epithelial (IME) cells is protective and requires p38 kinase. *Proc. Natl. Acad. Sci. USA* 99: 184–189.
- Edmunds, J. W., and L. C. Mahadevan, 2006 Cell signaling. Protein kinases seek close encounters with active genes. *Science* 313: 449–451.
- Edwards, M. C., N. Liegeois, J. Horecka, R. A. DePinho, G. F. Sprague Jr., *et al.* 1997 Human CPR (cell cycle progression restoration) genes impart a far phenotype on yeast cells. *Genetics* 147: 1063–1076.
- Egloff, S., and S. Murphy, 2008 Cracking the RNA polymerase II CTD code. *Trends Genet.* 24: 280–288.
- Ekiel, I., T. Sulea, G. Jansen, M. Kowalik, O. Minailiuc *et al.*, 2009 Binding the atypical RA domain of Ste50p to the unfolded Opy2p cytoplasmic tail is essential for the high-osmolarity glycerol pathway. *Mol. Biol. Cell* 20: 5117–5126.
- Elion, E. A., 2001 The Ste5p scaffold. *J. Cell Sci.* 114: 3967–3978.
- Eraso, P., M. J. Mazón, F. Posas, and F. Portillo, 2011 Gene expression profiling of yeasts overexpressing wild type or misfolded Pma1 variants reveals activation of the Hog1 MAPK pathway. *Mol. Microbiol.* 79: 1339–1352.
- Escoté, X., M. Zapater, J. Clotet, and F. Posas, 2004 Hog1 mediates cell-cycle arrest in G1 phase by the dual targeting of Sic1. *Nat. Cell Biol.* 6: 997–1002.
- Fassler, J. S., and A. H. West, 2010 Genetic and biochemical analysis of the SLN1 pathway in *Saccharomyces cerevisiae*. *Methods Enzymol.* 471: 291–317.
- Fassler, J. S., and A. H. West, 2011 Fungal Skn7 stress responses and their relationship to virulence. *Eukaryot. Cell* 10: 156–167.
- Ferreira, C., F. van Voorst, A. Martins, L. Neves, R. Oliveira *et al.*, 2005 A member of the sugar transporter family, Stl1p is the glycerol/H<sup>+</sup> symporter in *Saccharomyces cerevisiae*. *Mol. Biol. Cell* 16: 2068–2076.
- Ferrigno, P., F. Posas, D. Koepp, H. Saito, and P. A. Silver, 1998 Regulated nucleo/cytoplasmic exchange of HOG1 MAPK requires the importin  $\beta$  homologs NMD5 and XPO1. *EMBO J.* 17: 5606–5614.
- Flatauer, L. J., S. F. Zadeh, and L. Bardwell, 2005 Mitogen-activated protein kinases with distinct requirements for Ste5 scaffolding influence signaling specificity in *Saccharomyces cerevisiae*. *Mol. Cell Biol.* 25: 1793–1803.
- Flattery-O'Brien, J. A., and I. W. Dawes, 1998 Hydrogen peroxide causes *RAD9*-dependent cell cycle arrest in G2 in *Saccharomyces cerevisiae* whereas menadione causes G1 arrest independent of *RAD9* function. *J. Biol. Chem.* 273: 8564–8571.
- Fuda, N. J., M. B. Ardehali, and J. T. Lis, 2009 Defining mechanisms that regulate RNA polymerase II transcription *in vivo*. *Nature* 461: 186–192.
- Furukawa, K., Y. Hoshi, T. Maeda, T. Nakajima, and K. Abe, 2005 *Aspergillus nidulans* HOG pathway is activated only by two-component signalling pathway in response to osmotic stress. *Mol. Microbiol.* 56: 1246–1261.
- Gao, R., and A. M. Stock, 2009 Biological insights from structures of two-component proteins. *Annu. Rev. Microbiol.* 63: 133–154.
- García-Gimeno, M. A., and K. Struhl, 2000 Aca1 and Aca2, ATF/CREB activators in *Saccharomyces cerevisiae*, are important for carbon source utilization but not the response to stress. *Mol. Cell Biol.* 20: 4340–4349.
- Garí, E., T. Volpe, H. Wang, C. Gallego, B. Futcher *et al.*, 2001 Whi3 binds the mRNA of the G1 cyclin CLN3 to modulate cell fate in budding yeast. *Genes Dev.* 15: 2803–2808.
- Garrenton, L. S., S. L. Young, and J. Thorner, 2006 Function of the MAPK scaffold protein, Ste5, requires a cryptic PH domain. *Genes Dev.* 20: 1946–1958.



- Gasch, A. P., 2007 Comparative genomics of the environmental stress response in ascomycete fungi. *Yeast* 24: 961–976.
- Gasch, A. P., P. T. Spellman, C. M. Kao, O. Carmel-Harel, M. B. Eisen *et al.*, 2000 Genomic expression programs in the response of yeast cells to environmental changes. *Mol. Biol. Cell* 11: 4241–4257.
- Gat-Viks, I., and R. Shamir, 2007 Refinement and expansion of signaling pathways: the osmotic response network in yeast. *Genome Res.* 17: 358–367.
- Good, M., G. Tang, J. Singleton, A. Reményi, and W. A. Lim, 2009 The Ste5 scaffold directs mating signaling by catalytically unlocking the Fus3 MAP kinase for activation. *Cell* 136: 1085–1097.
- Grimshaw, S. J., H. R. Mott, K. M. Stott, P. R. Nielsen, K. A. Evetts *et al.*, 2004 Structure of the sterile  $\alpha$  motif (SAM) domain of the *Saccharomyces cerevisiae* mitogen-activated protein kinase pathway-modulating protein Ste50 and analysis of its interaction with the Ste11 SAM. *J. Biol. Chem.* 279: 2192–2201.
- Guha, N., P. Desai, and A. Vancura, 2007 Plc1p is required for SAGA recruitment and derepression of Sko1p-regulated genes. *Mol. Biol. Cell* 18: 2419–2428.
- Gustin, M. C., J. Albertyn, M. Alexander, and K. Davenport, 1998 MAP kinase pathways in the yeast *Saccharomyces cerevisiae*. *Microbiol. Mol. Biol. Rev.* 62: 1264–1300.
- Han, J., J.-D. Lee, L. Bibbs, and R. J. Ulevitch, 1994 A MAP kinase targeted by endotoxin and hyperosmolarity in mammalian cells. *Science* 265: 808–811.
- Hao, N., M. Behar, S. C. Parnell, M. P. Torres, C. H. Borchers *et al.*, 2007 A systems-biology analysis of feedback inhibition in the Sho1 osmotic-stress-response pathway. *Curr. Biol.* 17: 659–667.
- Hao, N., Y. Zeng, T. C. Elston, and H. G. Dohlman, 2008 Control of MAPK specificity by feedback phosphorylation of shared adaptor protein Ste50. *J. Biol. Chem.* 283: 33798–33802.
- Harris, K., R. E. Lamson, B. Nelson, T. R. Hughes, M. J. Marton *et al.*, 2001 Role of scaffolds in MAP kinase pathway specificity revealed by custom design of pathway-dedicated signaling proteins. *Curr. Biol.* 11: 1815–1824.
- Hayashi, M., and T. Maeda, 2006 Activation of the HOG pathway upon cold stress in *Saccharomyces cerevisiae*. *J. Biochem.* 139: 797–803.
- He, X. J., K. E. Mulford, and J. S. Fassler, 2009 Oxidative stress function of the *Saccharomyces cerevisiae* Skn7 receiver domain. *Eukaryot. Cell* 8: 768–778.
- Hersen, P., M. N. McClean, L. Mahadevan, and S. Ramanathan, 2008 Signal processing by the HOG MAP kinase pathway. *Proc. Natl. Acad. Sci. USA* 105: 7165–7170.
- Hickman, M. J., D. Spatt, and F. Winston, 2011 The Hog1 mitogen-activated protein kinase mediates a hypoxic response in *Saccharomyces cerevisiae*. *Genetics* 188: 325–338.
- Hirayama, T., T. Maeda, H. Saito, and K. Shinozaki, 1995 Cloning and characterization of seven cDNAs for hyperosmolarity-responsive (*HOR*) genes of *Saccharomyces cerevisiae*. *Mol. Gen. Genet.* 249: 127–138.
- Hohmann, S., 2002a Osmotic adaptation in yeast: control of the yeast osmolyte system. *Int. Rev. Cytol.* 215: 149–187.
- Hohmann, S., 2002b Osmotic stress signaling and osmoadaptation in yeasts. *Microbiol. Mol. Biol. Rev.* 66: 300–372.
- Hohmann, S., 2009 Control of high osmolarity signalling in the yeast *Saccharomyces cerevisiae*. *FEBS Lett.* 583: 4025–4029.
- Hohmann, S., M. Krantz, and B. Nordlander, 2007 Yeast osmoregulation. *Methods Enzymol.* 428: 29–45.
- Horie, T., K. Tatebayashi, R. Yamada, and H. Saito, 2008 Phosphorylated Ssk1 prevents unphosphorylated Ssk1 from activating the Ssk2 MAP kinase kinase in the yeast HOG osmoregulatory pathway. *Mol. Cell. Biol.* 28: 5172–5183.
- Hutzler, J., M. Schmid, T. Bernard, B. Henrissat, and S. Strahl, 2007 Membrane association is a determinant for substrate recognition by PMT4 protein O-mannosyltransferases. *Proc. Natl. Acad. Sci. USA* 104: 7827–7832.
- Jacoby, T., H. Flanagan, A. Faykin, A. G. Seto, C. Mattison *et al.*, 1997 Two protein-tyrosine phosphatases inactivate the osmotic stress response pathway in yeast by targeting the mitogen-activated protein kinase, Hog1. *J. Biol. Chem.* 272: 17749–17755.
- Janiak-Spens, F., and A. H. West, 2000 Functional roles of conserved amino acid residues surrounding the phosphorylatable histidine of the yeast phosphorelay protein YPD1. *Mol. Microbiol.* 37: 136–144.
- Janiak-Spens, F., J. M. Sparling, M. Gurfinkel, and A. H. West, 1999 Differential stabilities of phosphorylated response regulator domains reflect functional roles of the yeast osmoregulatory SLN1 and SSK1 proteins. *J. Bacteriol.* 181: 411–417.
- Janiak-Spens, F., D. P. Sparling, and A. H. West, 2000 Novel role for an HPT domain in stabilizing the phosphorylated state of a response regulator domain. *J. Bacteriol.* 182: 6673–6678.
- Janiak-Spens, F., P. F. Cook, and A. H. West, 2005 Kinetic analysis of YPD1-dependent phosphotransfer reactions in the yeast osmoregulatory phosphorelay system. *Biochemistry* 44: 377–386.
- Jansen, G., F. Bühring, C. P. Hollenberg, and M. Ramezani Rad, 2001 Mutations in the SAM domain of *STE50* differentially influence the MAPK-mediated pathways for mating, filamentous growth and osmotolerance in *Saccharomyces cerevisiae*. *Mol. Genet. Genomics* 265: 102–117.
- Jiang, C., and B. F. Pugh, 2009 Nucleosome positioning and gene regulation: advances through genomics. *Nat. Rev. Genet.* 10: 161–172.
- Joaquín, M., A. Gubern, D. González-Núñez, E. Josué Ruiz, I. Ferreira *et al.*, 2012 The p57 CDKi integrates stress signals into cell-cycle progression to promote cell survival upon stress. *EMBO J.* 31: 2952–2964.
- Jorgensen, P., and M. Tyers, 2000 The fork'ed path to mitosis. *Genome Biol.* 1: REVIEWS1022.
- Kapteyn, J. C., B. ter Riet, V. S. Blad, H. De Nobel, H. Van Den Ende *et al.*, 2001 Low external pH induces HOG1-dependent changes in the organization of the *Saccharomyces cerevisiae* cell wall. *Mol. Microbiol.* 39: 469–479.
- Kaserer, A. O., B. Andi, P. F. Cook, and A. H. West, 2009 Effects of osmolytes on the SLN1–YPD1–SSK1 phosphorelay system of *Saccharomyces cerevisiae*. *Biochemistry* 48: 8044–8050.
- Kaserer, A. O., B. Andi, P. F. Cook, and A. H. West, 2010 Kinetic studies of the yeast His-Asp phosphorelay signaling pathway. *Methods Enzymol.* 471: 59–75.
- Keogh, M. C., S. K. Kurdistani, S. A. Morris, S. H. Ahn, V. Podolny *et al.*, 2005 Cotranscriptional Set2 methylation of histone H3 lysine 36 recruits a repressive Rpd3 complex. *Cell* 123: 593–605.
- Ketela, T., J. L. Brown, R. C. Stewart, and H. Bussey, 1998 Yeast Skn7p activity is modulated by the Sln1p-Ypd1p osmosensor and contributes to regulation of the HOG pathway. *Mol. Genet.* 259: 372–378.
- Kim, K. Y., A. W. Truman, and D. E. Levin, 2008 Yeast Mpk1 mitogen-activated protein kinase activates transcription through Swi4/Swi6 by a noncatalytic mechanism that requires upstream signal. *Mol. Cell. Biol.* 28: 2579–2589.
- Klipp, E., B. Nordlander, R. Kruger, P. Gennemark, and S. Hohmann, 2005 Integrative model of the response of yeast to osmotic shock. *Nat. Biotechnol.* 23: 975–982.
- Klopf, E., L. Paskova, C. Solé, G. Mas, A. Petryshyn *et al.*, 2009 Cooperation between the INO80 complex and histone chaperones determines adaptation of stress gene transcription in the yeast *Saccharomyces cerevisiae*. *Mol. Cell. Biol.* 29: 4994–5007.
- Kobayashi, Y., T. Inai, M. Mizunuma, I. Okada, A. Shitamukai *et al.*, 2008 Identification of Tup1 and Cyc8 mutations defective in

- the responses to osmotic stress. *Biochem. Biophys. Res. Commun.* 368: 50–55.
- Krantz, M., E. Becit, and S. Hohmann, 2006a Comparative analysis of HOG pathway proteins to generate hypotheses for functional analysis. *Curr. Genet.* 49: 152–165.
- Krantz, M., E. Becit, and S. Hohmann, 2006b Comparative genomics of the HOG-signalling system in fungi. *Curr. Genet.* 49: 137–151.
- Krantz, M., D. Ahmadpour, L. G. Ottosson, J. Warringer, C. Waltermann *et al.*, 2009 Robustness and fragility in the yeast high osmolarity glycerol (HOG) signal-transduction pathway. *Mol. Syst. Biol.* 5: 281.
- Krems, B., C. Charizanis, and K. D. Entian, 1996 The response regulator-like protein Pos9/Skn7 of *Saccharomyces cerevisiae* is involved in oxidative stress resistance. *Curr. Genet.* 29: 327–334.
- Kwan, J. J., N. Warner, T. Pawson, and L. W. Donaldson, 2004 The solution structure of the *S. cerevisiae* Ste11 MAPKKK SAM domain and its partnership with Ste50. *J. Mol. Biol.* 342: 681–693.
- Kwan, J. J., N. Warner, J. Maini, K. W. C. Tung, H. Zakaria *et al.*, 2006 *Saccharomyces cerevisiae* Ste50 binds the MAPKKK Ste11 through a head-to-tail SAM domain interaction. *J. Mol. Biol.* 356: 142–154.
- Lamson, R. E., M. J. Winters, and P. M. Pryciak, 2002 Cdc42 regulation of kinase activity and signaling by the yeast p21-activated kinase Ste20. *Mol. Cell. Biol.* 22: 2939–2951.
- Lamson, R. E., S. Takahashi, M. J. Winters, and P. M. Pryciak, 2006 Dual role for membrane localization in yeast MAP kinase cascade activation and its contribution to signaling fidelity. *Curr. Biol.* 16: 618–623.
- Leberer, E., D. Dignard, D. Harcus, D. Y. Thomas, and M. Whiteway, 1992 The protein kinase homologue Ste20p is required to link the yeast pheromone response G-protein  $\beta\gamma$  subunits to downstream signalling components. *EMBO J.* 11: 4815–4824.
- Leberer, E., C. Wu, T. Leeuw, A. Fourest-Lieuvin, J. E. Segall *et al.*, 1997 Functional characterization of the Cdc42p binding domain of yeast Ste20p protein kinase. *EMBO J.* 16: 83–97.
- Lei, M., W. Lu, W. Meng, M.-C. Parrini, M. J. Eck *et al.*, 2000 Structure of PAK1 in an autoinhibited conformation reveals a multi-stage activation switch. *Cell* 102: 387–397.
- Li, B., M. Carey, and J. L. Workman, 2007a The role of chromatin during transcription. *Cell* 128: 707–719.
- Li, B., M. Gogol, M. Carey, D. Lee, C. Seidel *et al.*, 2007b Combined action of PHD and chromo domains directs the Rpd3S HDAC to transcribed chromatin. *Science* 316: 1050–1054.
- Li, B., M. Gogol, M. Carey, S. G. Pattenden, C. Seidel *et al.*, 2007c Infrequently transcribed long genes depend on the Set2/Rpd3S pathway for accurate transcription. *Genes Dev.* 21: 1422–1430.
- Li, H., C. K. Tsang, M. Watkins, P. G. Bertram, and X. F. Zheng, 2006 Nutrient regulates Tor1 nuclear localization and association with rDNA promoter. *Nature* 442: 1058–1061.
- Li, S., A. Ault, C. L. Malone, D. Raitt, S. Dean *et al.*, 1998 The yeast histidine protein kinase, Sln1p, mediates phosphotransfer to two response regulators, Ssk1p and Skn7p. *EMBO J.* 17: 6952–6962.
- Li, S., S. Dean, Z. Li, J. Horecka, R. J. Deschenes *et al.*, 2002 The eukaryotic two-component histidine kinase Sln1p regulates *OCH1* via the transcription factor, Skn7p. *Mol. Biol. Cell* 13: 412–424.
- Li, X., and M. Cai, 1999 Recovery of the yeast cell cycle from heat shock-induced G1 arrest involves a positive regulation of G1 cyclin expression by the S phase cyclin Clb5. *J. Biol. Chem.* 274: 24220–24231.
- Lo, W. S., E. R. Gamache, K. W. Henry, D. Yang, L. Pillus *et al.*, 2005 Histone H3 phosphorylation can promote TBP recruitment through distinct promoter-specific mechanisms. *EMBO J.* 24: 997–1008.
- Lu, J. M. Y., R. J. Deschenes, and J. S. Fassler, 2003 *Saccharomyces cerevisiae* histidine phosphotransferase Ypd1p shuttles between the nucleus and cytoplasm for *SLN1*-dependent phosphorylation of Ssk1p and Skn7p. *Eukaryot. Cell* 2: 1304–1314.
- Macia, J., S. Regot, T. Peeters, N. Conde, R. S ole *et al.*, 2009 Dynamic signaling in the Hog1 MAPK pathway relies on high basal signal transduction. *Sci. Signal.* 2: ra13.
- MacNeill, S. A., and P. Nurse, 1997 Cell cycle control in fission yeast, pp. 697–763 in *The Molecular and Cellular Biology of the Yeast Saccharomyces*, Vol. III, *Cell Cycle and Cell Biology*, edited by J. R. Pringle, J. R. Broach, and E. W. Jones. Cold Spring Harbor Laboratory Press, Cold Spring Harbor, NY.
- Maeda, T., A. Y. M. Tsai, and H. Saito, 1993 Mutations in a protein tyrosine phosphatase gene (*PTP2*) and a protein serine/threonine phosphatase gene (*PTC1*) cause a synthetic growth defect in *Saccharomyces cerevisiae*. *Mol. Cell. Biol.* 13: 5408–5417.
- Maeda, T., S. M. Wurgler-Murphy, and H. Saito, 1994 A two-component system that regulates an osmosensing MAP kinase cascade in yeast. *Nature* 369: 242–245.
- Maeda, T., M. Takekawa, and H. Saito, 1995 Activation of yeast PBS2 MAPKK by MAPKKs or by binding of an SH3-containing osmosensor. *Science* 269: 554–558.
- Mager, W. H., and J. C. S. Varela, 1993 Osmostress response of the yeast *Saccharomyces*. *Mol. Microbiol.* 10: 253–258.
- Maher, M., F. Cong, D. Kindelberger, K. Nasmyth, and S. Dalton, 1995 Cell cycle-regulated transcription of the *CLB2* gene is dependent on Mcm1 and a ternary complex factor. *Mol. Cell. Biol.* 15: 3129–3137.
- Mao, K., K. Wang, M. Zhao, T. Xu, and D. J. Klionsky, 2011 Two MAPK-signaling pathways are required for mitophagy in *Saccharomyces cerevisiae*. *J. Cell Biol.* 193: 755–767.
- Mapes, J., and I. M. Ota, 2004 Nbp2 targets the Ptc1-type 2C Ser/Thr phosphatase to the HOG MAPK pathway. *EMBO J.* 23: 302–311.
- Marles, J. A., S. Dahesh, J. Haynes, B. J. Andrews, and A. R. Davidson, 2004 Protein-protein interaction affinity plays a crucial role in controlling the Sho1p-mediated signal transduction pathway in yeast. *Mol. Cell* 14: 813–823.
- Mart n, H., M. Fl andez, C. Nombela, and M. Molina, 2005 Protein phosphatases in MAPK signalling: we keep learning from yeast. *Mol. Microbiol.* 58: 6–16.
- Mart nez-Monta es, F., A. Pascual-Ahuir, and M. Proft, 2010 Toward a genomic view of the gene expression program regulated by osmotic stress in yeast. *OMICS* 14: 619–627.
- Mart nez-Pastor, M. T., G. Marchler, C. Sch uller, A. Marchler-Bauer, H. Ruis *et al.*, 1996 The *Saccharomyces cerevisiae* zinc finger proteins Msn2p and Msn4p are required for transcriptional induction through the stress response element (STRE). *EMBO J.* 15: 2227–2235.
- Mas, G., E. de Nadal, R. Dechant, M. L. Rodr guez de la Concepci n, C. Logie *et al.*, 2009 Recruitment of a chromatin remodelling complex by the Hog1 MAP kinase to stress genes. *EMBO J.* 28: 326–336.
- Masumoto, H., S. Muramatsu, Y. Kamimura, and H. Araki, 2002 S-Cdk-dependent phosphorylation of Sld2 essential for chromosomal DNA replication in budding yeast. *Nature* 415: 651–655.
- Mattison, C. P., and I. M. Ota, 2000 Two protein tyrosine phosphatases, Ptp2 and Ptp3, modulate the subcellular localization of the Hog1 MAP kinase in yeast. *Genes Dev.* 14: 1229–1235.
- McClellan, M. N., A. Mody, J. R. Broach, and S. Ramanathan, 2007 Cross-talk and decision making in MAP kinase pathways. *Nat. Genet.* 39: 409–414.
- McMillan, J. N., M. S. Longtine, R. A. Sia, C. L. Theesfeld, E. S. Bardes *et al.*, 1999 The morphogenesis checkpoint in *Saccharomyces cerevisiae*: cell cycle control of Swe1p degradation by Hsl1p and Hsl7p. *Mol. Cell. Biol.* 19: 6929–6939.

- McNulty, J. J., and D. J. Lew, 2005 Swe1p responds to cytoskeletal perturbation, not bud size, in *S. cerevisiae*. *Curr. Biol.* 15: 2190–2198.
- Mettetal, J. T., D. Muzzey, C. Gómez-Urbe, and A. van Oudenaarden, 2008 The frequency dependence of osmo-adaptation in *Saccharomyces cerevisiae*. *Science* 319: 482–484.
- Miller, C., B. Schwalb, K. Maier, D. Schulz, S. Dümcke *et al.*, 2011 Dynamic transcriptome analysis measures rates of mRNA synthesis and decay in yeast. *Mol. Syst. Biol.* 7: 458.
- Mita, H., J. Tsutsui, M. Takekawa, E. A. Witten, and H. Saito, 2002 Regulation of MTK1/MEKK4 kinase activity by its N-terminal domain and GADD45 binding. *Mol. Cell. Biol.* 22: 4544–4555.
- Miyake, Z., M. Takekawa, Q. Ge, and H. Saito, 2007 Activation of MTK1/MEKK4 by GADD45 through induced N-C dissociation and dimerization-mediated trans autophosphorylation of the MTK1 kinase domain. *Mol. Cell. Biol.* 27: 2765–2776.
- Mody, A., J. Weiner, and S. Ramanathan, 2009 Modularity of MAP kinases allows deformation of their signalling pathways. *Nat. Cell Biol.* 11: 484–491.
- Molin, C., A. Jauhainen, J. Warringer, O. Nerman, and P. Sunnerhagen, 2009 mRNA stability changes precede changes in steady-state mRNA amounts during hyperosmotic stress. *RNA* 15: 600–614.
- Mollapour, M., and P. W. Piper, 2006 Hog1p mitogen-activated protein kinase determines acetic acid resistance in *Saccharomyces cerevisiae*. *FEMS Yeast Res.* 6: 1274–1280.
- Mollapour, M., and P. W. Piper, 2007 Hog1 mitogen-activated protein kinase phosphorylation targets the yeast Fps1 aquaglyceroporin for endocytosis, thereby rendering cells resistant to acetic acid. *Mol. Cell. Biol.* 27: 6446–6456.
- Morgan, B. A., G. R. Banks, W. M. Toone, D. Raitt, S. Kuge *et al.*, 1997 The Skn7 response regulator controls gene expression in the oxidative stress response of the budding yeast *Saccharomyces cerevisiae*. *EMBO J.* 16: 1035–1044.
- Morgan, D. O., 1999 Regulation of the APC and the exit from mitosis. *Nat. Cell Biol.* 1: E47–E53.
- Mösch, H.-U., R. L. Roberts, and G. R. Fink, 1996 Ras2 signals via the Cdc42/Ste20/mitogen-activated protein kinase module to induce filamentous growth in *Saccharomyces cerevisiae*. *Proc. Natl. Acad. Sci. USA* 93: 5352–5356.
- Murakami, Y., K. Tatebayashi, and H. Saito, 2008 Two adjacent docking sites in the yeast Hog1 mitogen-activated protein (MAP) kinase differentially interact with the Pbs2 MAP kinase kinase and the Ptp2 protein tyrosine phosphatase. *Mol. Cell. Biol.* 28: 2481–2494.
- Muzzey, D., C. A. Gomez-Urbe, J. T. Mettetal, and A. van Oudenaarden, 2009 A systems-level analysis of perfect adaptation in yeast osmoregulation. *Cell* 138: 160–171.
- Nehlin, J. O., M. Carlberg, and H. Ronne, 1992 Yeast SKO1 gene encodes a bZIP protein that binds to the CRE motif and acts as a repressor of transcription. *Nucleic Acids Res.* 20: 5271–5278.
- Nelson, B., A. B. Parsons, M. Evangelista, K. Schaefer, K. Kennedy *et al.*, 2004 Fus1p interacts with components of the Hog1p mitogen-activated protein kinase and Cdc42p morphogenesis signaling pathways to control cell fusion during yeast mating. *Genetics* 166: 67–77.
- Ni, L., C. Bruce, C. Hart, J. Leigh-Bell, D. Gelperin *et al.*, 2009 Dynamic and complex transcription factor binding during an inducible response in yeast. *Genes Dev.* 23: 1351–1363.
- Norbeck, J., and A. Blomberg, 1998 Amino acid uptake is strongly affected during exponential growth of *Saccharomyces cerevisiae* in 0.7 M NaCl medium. *FEMS Microbiol. Lett.* 158: 121–126.
- O'Rourke, S. M., and I. Herskowitz, 1998 The Hog1 MAPK prevents cross talk between the HOG and pheromone response MAPK pathways in *Saccharomyces cerevisiae*. *Genes Dev.* 12: 2874–2886.
- O'Rourke, S. M., and I. Herskowitz, 2002 A third osmosensing branch in *Saccharomyces cerevisiae* requires the Msb2 protein and functions in parallel with the Sho1 branch. *Mol. Cell. Biol.* 22: 4739–4749.
- O'Rourke, S. M., and I. Herskowitz, 2004 Unique and redundant roles for HOG MAPK pathway components as revealed by whole-genome expression analysis. *Mol. Biol. Cell* 15: 532–542.
- O'Rourke, S. M., I. Herskowitz, and E. K. O'Shea, 2002 Yeast go the whole HOG for the hyperosmotic response. *Trends Genet.* 18: 405–412.
- Ostrander, D. B., and J. A. Gorman, 1999 The extracellular domain of the *Saccharomyces cerevisiae* Sln1p membrane osmolarity sensor is necessary for kinase activity. *J. Bacteriol.* 181: 2527–2534.
- Ota, I. M., and A. Varshavsky, 1993 A yeast protein similar to bacterial two-component regulators. *Science* 262: 566–569.
- Panadero, J., and C. Pallotti, S. Rodríguez-Vargas, F. Randez-Gil, and J. A. Prieto, 2006 A downshift in temperature activates the high osmolarity glycerol (HOG) pathway, which determines freeze tolerance in *Saccharomyces cerevisiae*. *J. Biol. Chem.* 281: 4638–4645.
- Park, S.-H., A. Zarrinpar, and W. A. Lim, 2003 Rewiring MAP kinase pathways using alternative scaffold assembly mechanisms. *Science* 299: 1061–1064.
- Parmar, J. H., S. Bhartiya, and K. V. Venkatesh, 2011 Characterization of the adaptive response and growth upon hyperosmotic shock in *Saccharomyces cerevisiae*. *Mol. BioSyst.* 7: 1138–1148.
- Pascual-Ahuir, A., F. Posas, R. Serrano, and M. Proft, 2001 Multiple levels of control regulate the yeast cAMP-response element-binding protein repressor Sko1p in response to stress. *J. Biol. Chem.* 276: 37373–37378.
- Pascual-Ahuir, A., K. Struhl, and M. Proft, 2006 Genome-wide location analysis of the stress-activated MAP kinase Hog1 in yeast. *Methods* 40: 272–278.
- Patterson, J. C., E. S. Klimenko, and J. Thorner, 2010 Single-cell analysis reveals that insulation maintains signaling specificity between two yeast MAPK pathways with common components. *Sci. Signal.* 3: ra75.
- Pelet, S., F. Rudolf, M. Nadal-Ribelles, E. de Nadal, F. Posas *et al.*, 2011 Transient activation of the HOG MAPK pathway regulates bimodal gene expression. *Science* 332: 732–735.
- Pereira, G., T. Höfken, J. Grindlay, C. Manson, and E. Schiebel, 2000 The Bub2p spindle checkpoint links nuclear migration with mitotic exit. *Mol. Cell* 6: 1–10.
- Peter, M., A. M. Neiman, H.-O. Park, M. van Lohuizen, and I. Herskowitz, 1996 Functional analysis of the interaction between the small GTP binding protein Cdc42 and the Ste20 protein kinase in yeast. *EMBO J.* 15: 7046–7059.
- Pitoniak, A., B. Birkaya, H. M. Dionne, N. Vadaie, and P. J. Cullen, 2009 The signaling mucins Msb2 and Hkr1 differentially regulate the filamentation mitogen-activated protein kinase pathway and contribute to a multimodal response. *Mol. Biol. Cell* 20: 3101–3114.
- Pokholok, D. K., J. Zeitlinger, N. M. Hannett, D. B. Reynolds, and R. A. Young, 2006 Activated signal transduction kinases frequently occupy target genes. *Science* 313: 533–536.
- Porter, S. W., and A. N. West, 2005 A common docking site for response regulators on the yeast phosphorelay protein YPD1. *Biochim. Biophys. Acta* 1748: 138–145.
- Porter, S. W., Q. Xu, and A. N. West, 2003 Ssk1p response regulator binding surface on histidine-containing phosphotransfer protein Ypd1p. *Eukaryot. Cell* 2: 27–33.
- Posas, F., and H. Saito, 1997 Osmotic activation of the HOG MAPK pathway via Ste11p MAPKKK: Scaffold role of Pbs2p MAPKK. *Science* 276: 1702–1705.
- Posas, F., and H. Saito, 1998 Activation of the yeast SSK2 MAP kinase kinase kinase by the SSK1 two-component response regulator. *EMBO J.* 17: 1385–1394.
- Posas, F., S. M. Wurgler-Murphy, T. Maeda, E. A. Witten, T. C. Thai *et al.*, 1996 Yeast HOG1 MAP kinase cascade is regulated by

- a multistep phosphorelay mechanism in the SLN1-YPD1-SSK1 “two-component” osmosensor. *Cell* 86: 865–875.
- Posas, F., E. A. Witten, and H. Saito, 1998 Requirement of STE50 for osmostress-induced activation of the STE11 mitogen-activated protein kinase kinase in the high-osmolarity glycerol response pathway. *Mol. Cell. Biol.* 18: 5788–5796.
- Posas, F., J. R. Chambers, J. A. Heyman, J. P. Hoeffler, E. de Nadal *et al.*, 2000 The transcriptional response of yeast to saline stress. *J. Biol. Chem.* 275: 17249–17255.
- Proft, M., and K. Struhl, 2002 Hog1 kinase converts the Sko1-Cyc8-Tup1 repressor complex into an activator that recruits SAGA and SWI/SNF in response to osmotic stress. *Mol. Cell* 9: 1307–1317.
- Proft, M., and K. Struhl, 2004 MAP kinase-mediated stress relief that precedes and regulates the timing of transcriptional induction. *Cell* 118: 351–361.
- Proft, M., A. Pascual-Ahuir, E. de Nadal, J. Ariño, R. Serrano *et al.*, 2001 Regulation of the Sko1 transcriptional repressor by the Hog1 MAP kinase in response to osmotic stress. *EMBO J.* 20: 1123–1133.
- Proft, M., F. D. Gibbons, M. Copeland, F. P. Roth, and K. Struhl, 2005 Genomewide identification of Sko1 target promoters reveals a regulatory network that operates in response to osmotic stress in *Saccharomyces cerevisiae*. *Eukaryot. Cell* 4: 1343–1352.
- Proft, M., G. Mas, E. de Nadal, A. Vendrell, N. Noriega *et al.*, 2006 The stress-activated Hog1 kinase is a selective transcriptional elongation factor for genes responding to osmotic stress. *Mol. Cell* 23: 241–250.
- Pryciak, P. M., and F. A. Huntress, 1998 Membrane recruitment of the kinase cascade scaffold protein Ste5 by the G $\beta$  $\gamma$  complex underlies activation of the yeast pheromone response pathway. *Genes Dev.* 12: 2684–2697.
- Qiao, F., and J. U. Bowie, 2005 The many faces of SAM. *Sci. STKE* 2005: re7. Review.
- Raitt, D. C., A. L. Johnson, A. M. Erkin, K. Makino, B. Morgan *et al.*, 2000a The Skn7 response regulator of *Saccharomyces cerevisiae* interacts with Hsf1 in vivo and is required for the induction of heat shock genes by oxidative stress. *Mol. Biol. Cell* 11: 2335–2347.
- Raitt, D. C., F. Posas, and H. Saito, 2000b Yeast Cdc42 GTPase and Ste20 PAK-like kinase regulate Sho1-dependent activation of the Hog1 MAPK pathway. *EMBO J.* 19: 4623–4631.
- Ramezani-Rad, M., 2003 The role of adaptor protein Ste50-dependent regulation of the MAPKKK Ste11 in multiple signaling pathways of yeast. *Curr. Genet.* 43: 161–170.
- Ramezani Rad, M., G. Xu, and C. P. Hollenberg, 1992 *STE50*, a novel gene required for activation of conjugation at an early step in mating in *Saccharomyces cerevisiae*. *Mol. Gen. Genet.* 236: 145–154.
- Ramezani Rad, M., G. Jansen, F. Bühring, and C. P. Hollenberg, 1998 Ste50p is involved in regulating filamentous growth in the yeast *Saccharomyces cerevisiae* and associates with Ste11p. *Mol. Gen. Genet.* 259: 29–38.
- Reiser, V., H. Ruis, and G. Ammerer, 1999 Kinase activity-dependent nuclear export opposes stress-induced nuclear accumulation and retention of Hog1 mitogen-activated protein kinase in the budding yeast *Saccharomyces cerevisiae*. *Mol. Biol. Cell* 10: 1147–1161.
- Reiser, V., S. M. Salah, and G. Ammerer, 2000 Polarized localization of yeast Pbs2 depends on osmostress, the membrane protein Sho1 and Cdc42. *Nat. Cell Biol.* 2: 620–627.
- Reiser, V., D. C. Raitt, and H. Saito, 2003 Yeast osmosensor Sln1 and plant cytokinin receptor Cre1 respond to changes in turgor pressure. *J. Cell Biol.* 161: 1035–1040.
- Reiser, V., K. E. D’Aquino, L. S. Ee, and A. Amon, 2006 The stress-activated mitogen-activated protein kinase signaling cascade promotes exit from mitosis. *Mol. Biol. Cell* 17: 3136–3146.
- Reményi, A., M. C. Good, R. P. Bhattacharyya, and W. A. Lim, 2005 The role of docking interactions in mediating signaling input, output, and discrimination in the yeast MAPK network. *Mol. Cell* 20: 951–962.
- Rensing, L., and P. Ruoff, 2009 How can yeast cells decide between three activated MAP kinase pathways? A model approach. *J. Theor. Biol.* 257: 578–587.
- Rep, M., J. Albertyn, J. M. Thevelein, B. A. Prior, and S. Hohmann, 1999a Different signalling pathways contribute to the control of *GPD1* gene expression by osmotic stress in *Saccharomyces cerevisiae*. *Microbiology* 145: 715–727.
- Rep, M., V. Reiser, U. Gartner, J. M. Thevelein, S. Hohmann *et al.*, 1999b Osmotic stress-induced gene expression in *Saccharomyces cerevisiae* requires Msn1p and the novel nuclear factor Hot1p. *Mol. Cell. Biol.* 19: 5474–5485.
- Rep, M., M. Krantz, J. M. Thevelein, and S. Hohmann, 2000 The transcriptional response of *Saccharomyces cerevisiae* to osmotic shock: Hot1p and Msn2p/Msn4p are required for the induction of subsets of high osmolarity glycerol pathway-dependent genes. *J. Biol. Chem.* 275: 8290–8300.
- Rep, M., M. Proft, F. Remize, M. Tamás, R. Serrano *et al.*, 2001 The *Saccharomyces cerevisiae* Sko1p transcription factor mediates HOG pathway-dependent osmotic regulation of a set of genes encoding enzymes implicated in protection from oxidative damage. *Mol. Microbiol.* 40: 1067–1083.
- Robyr, D., Y. Suka, I. Xenarios, S. K. Kurdistani, A. Wang *et al.*, 2002 Microarray deacetylation maps determine genome-wide functions for yeast histone deacetylases. *Cell* 109: 437–446.
- Romero-Santacreu, L., J. Moreno, J. E. Pérez-Ortín, and P. Alepuz, 2009 Specific and global regulation of mRNA stability during osmotic stress in *Saccharomyces cerevisiae*. *RNA* 15: 1110–1120.
- Saito, H., 2001 Histidine phosphorylation and two-component signaling in eukaryotic cells. *Chem. Rev.* 101: 2497–2509.
- Saito, H., 2010 Regulation of cross-talk in yeast MAPK signaling pathways. *Curr. Opin. Microbiol.* 13: 677–683.
- Saito, H., and K. Tatebayashi, 2004 Regulation of the osmoregulatory HOG MAPK cascade in yeast. *J. Biochem.* 136: 267–272.
- Sato, N., H. Kawahara, A. Toh-e, and T. Maeda, 2003 Phosphorelay-regulated degradation of the yeast Ssk1p response regulator by the ubiquitin-proteasome system. *Mol. Cell. Biol.* 23: 6662–6671.
- Saunders, A., L. J. Core, and J. T. Lis, 2006 Breaking barriers to transcription elongation. *Nat. Rev. Mol. Cell Biol.* 7: 557–567.
- Schaber, J., M. A. Adrover, E. Eriksson, S. Pelet, E. Petelenz-Kurdziel *et al.*, 2010 Biophysical properties of *Saccharomyces cerevisiae* and their relationship with HOG pathway activation. *Eur. Biophys. J.* 39: 1547–1556.
- Schaber, J., M. Flöttmann, J. Li, C. F. Tiger, S. Hohmann *et al.*, 2011 Automated ensemble modeling with *modelMaGe*: analyzing feedback mechanisms in the Sho1 branch of the HOG pathway. *PLoS ONE* 6: e14791.
- Schaller, G. E., S. H. Shiu, and J. P. Armitage, 2011 Two-component systems and their co-option for eukaryotic signal transduction. *Curr. Biol.* 21: R320–R330.
- Schmitt, A. P., and K. McEntee, 1996 Msn2p, a zinc finger DNA-binding protein, is the transcriptional activator of the multistress response in *Saccharomyces cerevisiae*. *Proc. Natl. Acad. Sci. USA* 93: 5777–5782.
- Schwartz, M. A., and H. D. Madhani, 2004 Principles of MAP kinase signaling specificity in *Saccharomyces cerevisiae*. *Annu. Rev. Genet.* 38: 725–748.
- Schwob, E., T. Böhm, M. D. Mendenhall, and K. Nasmyth, 1994 The B-type cyclin kinase inhibitor p40<sup>SIC1</sup> controls the G1 to S transition in *S. cerevisiae*. *Cell* 79: 233–244.
- Shahbazian, M. D., and M. Grunstein, 2007 Functions of site-specific histone acetylation and deacetylation. *Annu. Rev. Biochem.* 76: 75–100.

- Shankarnarayan, S., C. L. Malone, R. J. Deschenes, and J. S. Fassler, 2008 Modulation of yeast Sln1 kinase activity by the Ccw12 cell wall protein. *J. Biol. Chem.* 283: 1962–1973.
- Sheikh-Hamad, D., and M. C. Gustin, 2004 MAP kinases and the adaptive response to hypertonicity: functional preservation from yeast to mammals. *Am. J. Physiol. Renal Physiol.* 287: F1102–F1110.
- Shivaswamy, S., and V. R. Iyer, 2008 Stress-dependent dynamics of global chromatin remodeling in yeast: dual role for SWI/SNF in the heat shock stress response. *Mol. Cell. Biol.* 28: 2221–2234.
- Shock, T. R., J. Thompson, J. R. Yates, and H. D. Madhani, 2009 Hog1 mitogen-activated protein kinase (MAPK) interrupts signal transduction between the Kss1 MAPK and the Tec1 transcription factor to maintain pathway specificity. *Eukaryot. Cell* 8: 606–616.
- Siderius, M., O. Van Wuytswinkel, K. A. Reijenga, M. Kelders, and W. H. Mager, 2000 The control of intracellular glycerol in *Saccharomyces cerevisiae* influences osmotic stress response and resistance to increased temperature. *Mol. Microbiol.* 36: 1381–1390.
- Solé, C., M. Nadal-Ribelles, C. Kraft, M. Peter, F. Posas *et al.*, 2011 Control of Ubp3 ubiquitin protease activity by the Hog1 SAPK modulates transcription upon osmotic stress. *EMBO J.* 30: 3274–3284.
- Song, H. K., J. Y. Lee, M. G. Lee, J. Moon, K. Min *et al.*, 1999 Insights into eukaryotic multistep phosphorelay signal transduction revealed by the crystal structure of Ypd1 from *Saccharomyces cerevisiae*. *J. Mol. Biol.* 293: 753–761.
- Sotelo, J., and M. A. Rodríguez-Gabriel, 2006 Mitogen-activated protein kinase Hog1 is essential for the response to arsenite in *Saccharomyces cerevisiae*. *Eukaryot. Cell* 5: 1826–1830.
- Soufi, B., C. D. Kelstrup, G. Stoehr, F. Fröhlich, T. C. Walther *et al.*, 2009 Global analysis of the yeast osmotic stress response by quantitative proteomics. *Mol. Biosyst.* 5: 1337–1346.
- Sprague, G. F., 1998 Control of MAP kinase signaling specificity or how not to go HOG wild. *Genes Dev.* 12: 2817–2820.
- Stegmeier, F., and A. Amon, 2004 Closing mitosis: the functions of the Cdc14 phosphatase and its regulation. *Annu. Rev. Genet.* 38: 203–232.
- Stock, A. M., V. L. Robinson, and P. N. Goudreau, 2000 Two-component signal transduction. *Annu. Rev. Biochem.* 69: 183–215.
- Takekawa, M., and H. Saito, 1998 A family of stress-inducible GADD45-like proteins mediate activation of the stress-responsive MTK1/MEKK4 MAPKKK. *Cell* 95: 521–530.
- Takekawa, M., F. Posas, and H. Saito, 1997 A human homolog of the yeast Ssk2/Ssk22 MAP kinase kinase kinases, MTK1, mediates stress-induced activation of the p38 and JNK pathways. *EMBO J.* 16: 4973–4982.
- Tamás, M. J., K. Luyten, F. C. Sutherland, A. Hernandez, J. Albertyn *et al.*, 1999 Fps1p controls the accumulation and release of the compatible solute glycerol in yeast osmoregulation. *Mol. Microbiol.* 31: 1087–1104.
- Tamás, M. J., M. Rep, J. M. Thevelein, and S. Hohmann, 2000 Stimulation of the yeast high osmolarity glycerol (HOG) pathway: evidence for a signal generated by a change in turgor rather than by water stress. *FEBS Lett.* 472: 159–165.
- Tanaka, S., T. Umemori, K. Hirai, S. Muramatsu, Y. Kamimura *et al.*, 2007 CDK-dependent phosphorylation of Sld2 and Sld3 initiates DNA replication in budding yeast. *Nature* 445: 328–332.
- Tanigawa, M., A. Kihara, M. Terashima, T. Takahara, and T. Maeda, 2012 Sphingolipids regulate the yeast high osmolarity-responsive HOG pathway. *Mol. Cell. Biol.* 32: 2861–2870.
- Tao, W., R. J. Deschenes, and J. S. Fassler, 1999 Intracellular glycerol levels modulate the activity of Sln1p, a *Saccharomyces cerevisiae* two-component regulator. *J. Biol. Chem.* 274: 360–367.
- Tatebayashi, K., M. Takekawa, and H. Saito, 2003 A docking site determining specificity of Pbs2 MAPKK for Ssk2/Ssk22 MAPKKKs in the yeast HOG pathway. *EMBO J.* 22: 3624–3634.
- Tatebayashi, K., K. Yamamoto, K. Tanaka, T. Tomida, T. Maruoka *et al.*, 2006 Adaptor functions of Cdc42, Ste50, and Sho1 in the yeast osmoregulatory HOG MAPK pathway. *EMBO J.* 25: 3033–3044.
- Tatebayashi, K., K. Tanaka, H.-Y. Yang, K. Yamamoto, Y. Matsushita *et al.*, 2007 Transmembrane mucins Hkr1 and Msb2 are putative osmosensors in the SHO1 branch of yeast HOG pathway. *EMBO J.* 26: 3521–3533.
- Teige, M., E. Scheikl, V. Reiser, H. Ruis, and G. Ammerer, 2001 Rck2, a member of the calmodulin-protein kinase family, links protein synthesis to high osmolarity MAP kinase signaling in budding yeast. *Proc. Natl. Acad. Sci. USA* 98: 5625–5630.
- Thorsen, M., Y. Di, C. Tängemo, M. Morillas, D. Ahmadpour *et al.*, 2006 The MAPK Hog1p modulates Fps1p-dependent arsenite uptake and tolerance in yeast. *Mol. Biol. Cell* 17: 4400–4410.
- Tjandra, H., J. Compton, and D. Kellogg, 1998 Control of mitotic events by the Cdc42 GTPase, the Clb2 cyclin and a member of the PAK kinase family. *Curr. Biol.* 8: 991–1000.
- Toh-e, A., and T. Oguchi, 2001 Defects in glycosylphosphatidylinositol (GPI) anchor synthesis activate Hog1 kinase and confer copper-resistance in *Saccharomyces cerevisiae*. *Genes Genet. Syst.* 76: 393–410.
- Tokishita, S., and T. Mizuno, 1994 Transmembrane signal transduction by the *Escherichia coli* osmotic sensor, EnvZ: intermolecular complementation of transmembrane signalling. *Mol. Microbiol.* 13: 435–444.
- Tomás-Cobos, L., L. Casadomé, G. Mas, P. Sanz, and F. Posas, 2004 Expression of the *HXT1* low affinity glucose transporter requires the coordinated activities of the HOG and glucose signalling pathways. *J. Biol. Chem.* 279: 22010–22019.
- Torres-Quiroz, F., S. García-Marqués, R. Coria, F. Rande-Gil, and J. A. Prieto, 2010 The activity of yeast Hog1 MAPK is required during endoplasmic reticulum stress induced by tunicamycin exposure. *J. Biol. Chem.* 285: 20088–20096.
- Truckses, D. M., J. E. Bloomekatz, and J. Thorne, 2006 The RA domain of Ste50 adaptor protein is required for delivery of Ste11 to the plasma membrane in the filamentous growth signaling pathway of the yeast *Saccharomyces cerevisiae*. *Mol. Cell. Biol.* 26: 912–928.
- Uesono, Y., and A. Toh-e, 2002 Transient inhibition of translation initiation by osmotic stress. *J. Biol. Chem.* 277: 13848–13855.
- Vadaie, N., H. Dionne, D. S. Akajagbor, and S. R. Nickerson, D. J. Krysan *et al.*, 2008 Cleavage of the signaling mucin Msb2 by the aspartyl protease Yps1 is required for MAPK activation in yeast. *J. Cell Biol.* 181: 1073–1081.
- van Drogen, F., S. M. O'Rourke, V. M. Stucke, M. Jaquenoud, A. M. Neiman *et al.*, 2000 Phosphorylation of the MEKK Ste11p by the PAK-like kinase Ste20p is required for MAP kinase signaling *in vivo*. *Curr. Biol.* 10: 630–639.
- Vasudevan, S., and S. W. Peltz, 2001 Regulated ARE-mediated mRNA decay in *Saccharomyces cerevisiae*. *Mol. Cell* 7: 1191–1200.
- Vendrell, A., M. Martínez-Pastor, A. González-Novo, A. Pascual-Ahuir, D. A. Sinclair *et al.*, 2011 Sir2 histone deacetylase prevents programmed cell death caused by sustained activation of the Hog1 stress-activated protein kinase. *EMBO Rep.* 12: 1062–1068.
- Verma, R., R. S. Annan, M. J. Huddleston, S. A. Carr, G. Reynard *et al.*, 1997 Phosphorylation of Sic1p by G1 Cdk required for its degradation and entry into S phase. *Science* 278: 455–460.
- Vincent, A. C., and K. Struhl, 1992 ACR1, a yeast ATF/CREB repressor. *Mol. Cell. Biol.* 12: 5394–5405.
- Wang, L. C., L. K. Morgan, P. Godakumbura, L. J. Kenney, and G. S. Anand, 2012 The inner membrane histidine kinase EnvZ senses osmolality via helix-coil transitions in the cytoplasm. *EMBO J.* 31: 2648–2659.
- Wang, X., C. H. McGowan, M. Zhao, L. He, J. S. Downey *et al.*, 2000 Involvement of the MKK6-p38gamma cascade in gamma-

- radiation-induced cell cycle arrest. *Mol. Cell. Biol.* 20: 4543–4552.
- Wang, Y., A. A. Irqeba, M. Ayalew, and K. Suntay, 2009 Sumoylation of transcription factor Tec1 regulates signaling of mitogen-activated protein kinase pathways in yeast. *PLoS ONE* 4: e7456.
- Warmka, J., J. Hanneman, J. Lee, D. Amin, and I. Ota, 2001 Ptc1, a type 2C Ser/Thr phosphatase, inactivates the HOG pathway by dephosphorylating the mitogen-activated protein kinase Hog1. *Mol. Cell. Biol.* 21: 51–60.
- Warringer, J., M. Hult, S. Regot, F. Posas, and P. Sunnerhagen, 2010 The HOG pathway dictates the short-term translational response after hyperosmotic shock. *Mol. Biol. Cell* 21: 3080–3092.
- Watanabe, T., S. Srichuwong, M. Arakane, S. Tamiya, M. Yoshinaga *et al.*, 2010 Selection of stress-tolerant yeasts for simultaneous saccharification and fermentation (SSF) of very high gravity (VHG) potato mash to ethanol. *Bioresour. Technol.* 101: 9710–9714.
- Wertman, K. F., D. G. Drubin, and D. Botstein, 1992 Systematic mutational analysis of the yeast *ACT1* gene. *Genetics* 132: 337–350.
- Westfall, P. J., and J. Thorner, 2006 Analysis of mitogen-activated protein kinase signaling specificity in response to hyperosmotic stress: use of an analog-sensitive *HOG1* allele. *Eukaryot. Cell* 5: 1215–1228.
- Westfall, P. J., J. C. Patterson, R. E. Chen, and J. Thorner, 2008 Stress resistance and signal fidelity independent of nuclear MAPK function. *Proc. Natl. Acad. Sci. USA* 105: 12212–12217.
- Winkler, A., C. Arkind, C. P. Mattison, A. Burkholder, K. Knoche *et al.*, 2002 Heat stress activates the yeast high-osmolarity glycerol mitogen-activated protein kinase pathway, and protein tyrosine phosphatases are essential under heat stress. *Eukaryot. Cell* 1: 163–173.
- Winters, M. J., R. E. Lamson, H. Nakanishi, A. M. Neiman, and P. M. Pryciak, 2005 A membrane binding domain in the Ste5 scaffold synergizes with G $\beta$  $\gamma$  binding to control localization and signaling in pheromone response. *Mol. Cell* 20: 21–32.
- Wood, J. M., 1999 Osmosensing by bacteria: signals and membrane-based sensors. *Microbiol. Mol. Biol. Rev.* 63: 230–262.
- Wood, J. M., 2011 Bacterial osmoregulation: a paradigm for the study of cellular homeostasis. *Annu. Rev. Microbiol.* 65: 215–238.
- Wu, C., E. Leberer, D. Y. Thomas, and M. Whiteway, 1999 Functional characterization of the interaction of Ste50p with Ste11p MAPKKK in *Saccharomyces cerevisiae*. *Mol. Biol. Cell* 10: 2425–2440.
- Wu, C., G. Jansen, J. Zhang, D. Y. Thomas, and M. Whiteway, 2006 Adaptor protein Ste50p links the Ste11p MEKK to the HOG pathway through plasma membrane association. *Genes Dev.* 20: 734–746.
- Wurgler-Murphy, S. M., T. Maeda, E. A. Witten, and H. Saito, 1997 Regulation of the *Saccharomyces cerevisiae* *HOG1* mitogen-activated protein kinase by the *PTP2* and *PTP3* protein tyrosine phosphatases. *Mol. Cell. Biol.* 17: 1289–1297.
- Xu, G., G. Jansen, D. Y. Thomas, C. P. Hollenberg, and M. Ramezani Rad, 1996 Ste50p sustains mating pheromone-induced signal transduction in the yeast *Saccharomyces cerevisiae*. *Mol. Microbiol.* 20: 773–783.
- Xu, Q., and A. H. West, 1999 Conservation of structure and function among histidine-containing phosphotransfer (HPT) domains as revealed by the crystal structure of YPD1. *J. Mol. Biol.* 292: 1039–1050.
- Xu, Q., S. W. Porter, and A. N. West, 2003 The yeast YPD1/SLN1 complex: insights into molecular recognition in two-component signaling systems. *Structure* 11: 1569–1581.
- Yaakov, G., M. Bell, S. Hohmann, and D. Engelberg, 2003 Combination of two activating mutations in one *HOG1* gene forms hyperactive enzyme that induce growth arrest. *Mol. Cell. Biol.* 23: 4826–4840.
- Yaakov, G., A. Duch, M. García-Rubio, J. Clotet, J. Jimenez *et al.*, 2009 The stress-activated protein kinase Hog1 mediates S phase delay in response to osmotic stress. *Mol. Biol. Cell* 20: 3572–3582.
- Yamamoto, K., K. Tatebayashi, K. Tanaka, and H. Saito, 2010 Dynamic control of yeast MAP kinase network by induced association and dissociation between the Ste50 scaffold and the Opy2 membrane anchor. *Mol. Cell* 40: 87–98.
- Yancey, P. H., 2005 Organic osmolytes as compatible, metabolic and counteracting cytoprotectants in high osmolarity and other stresses. *J. Exp. Biol.* 208: 2819–2830.
- Yang, H.-Y., K. Tatebayashi, K. Yamamoto, and H. Saito, 2009 Glycosylation defects activate filamentous growth Kss1 MAPK and inhibit osmoregulatory Hog1 MAPK. *EMBO J.* 28: 1380–1391.
- Yang, X. J., and E. Seto, 2008 The Rpd3/Hda1 family of lysine deacetylases: from bacteria and yeast to mice and men. *Nat. Rev. Mol. Cell Biol.* 9: 206–218.
- Yoshida, T., S. Phadtare, and M. Inouye, 2007 Functional and structural characterization of EnvZ, an osmosensing histidine kinase of *E. coli*. *Methods Enzymol.* 423: 184–202.
- Young, C., J. Mapes, J. Hanneman, S. Al-Zarban, and I. Ota, 2002 Role of Ptc2 type 2C Ser/Thr phosphatase in yeast high-osmolarity glycerol pathway inactivation. *Eukaryot. Cell* 1: 1032–1040.
- Yuzyuk, T., and D. C. Amberg, 2003 Actin recovery and bud emergence in osmotically stressed cells requires the conserved actin interacting mitogen-activated protein kinase kinase Ssk2p/MTK1 and the scaffold protein Spa2p. *Mol. Biol. Cell* 14: 3013–3026.
- Yuzyuk, T., M. Foehr, and D. C. Amberg, 2002 The MEK kinase Ssk2p promotes actin cytoskeleton recovery after osmotic stress. *Mol. Biol. Cell* 13: 2869–2880.
- Zaman, S., S. I. Lippman, X. Zhao, and J. R. Broach, 2008 How *Saccharomyces* responds to nutrients. *Annu. Rev. Genet.* 42: 27–81.
- Zapater, M., J. Clotet, X. Escoté, and F. Posas, 2005 Control of cell cycle progression by the stress-activated Hog1 MAPK. *Cell Cycle* 4: 6–7.
- Zapater, M., M. Sohrmann, M. Peter, F. Posas, and E. de Nadal, 2007 Selective requirement for SAGA in Hog1-mediated gene expression depending on the severity of the external osmotic stress conditions. *Mol. Cell. Biol.* 27: 3900–3910.
- Zarrinpar, A., S.-H. Park, and W. A. Lim, 2003 Optimization of specificity in a cellular protein interaction network by negative selection. *Nature* 426: 676–680.
- Zarrinpar, A., R. P. Bhattacharyya, M. P. Nittler, and W. A. Lim, 2004 Sho1 and Pbs2 act as coscaffolds linking components in the yeast high osmolarity MAP kinase pathway. *Mol. Cell* 14: 825–832.
- Zhan, X.-L., and K.-L. Guan, 1999 A specific protein-protein interaction accounts for the in vivo substrate selectivity of Ptp3 towards the Fus3 MAP kinase. *Genes Dev.* 13: 2811–2827.
- Zhao, X., D. M. Copeland, A. S. Soares, and A. H. West, 2008 Crystal structure of a complex between the phosphorelay protein YPD1 and the response regulator domain of SLN1 bound to a phosphoryl analog. *J. Mol. Biol.* 375: 1141–1151.
- Zi, Z., W. Liebermeister, and E. Klipp, 2010 A quantitative study of the Hog1 MAPK response to fluctuating osmotic stress in *Saccharomyces cerevisiae*. *PLoS ONE* 5: e9522.
- Zinzalla, V., M. Graziola, A. Mastriani, M. Vanoni, and L. Alberghina, 2007 Rapamycin-mediated G1 arrest involves regulation of the Cdk inhibitor Sic1 in *Saccharomyces cerevisiae*. *Mol. Microbiol.* 63: 1482–1494.
- Zou, X., T. Peng, and Z. Pan, 2007 Modeling specificity in the yeast MAPK signaling networks. *J. Theor. Biol.* 250: 139–155.

Communicating editor: P. Pryciak
